# Supplementary material for: On the gap between crop and land surface models: comparing irrigation and other land surface estimates from AquaCrop and Noah-MP over the Po Valley
Source: Copernicus journal article supplement (doi:10.5194/egusphere-2025-2550), 2025-07-01
Supplement: Supplementary file [file egusphere-2025-2550-RC3-supplement.pdf]

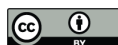

# On the gap between crop and land surface models: comparing irrigation and other land surface estimates from AquaCrop and Noah-MP over the Po Valley

Busschaert Louise<sup>1</sup>, Bechtold Michel<sup>1</sup>, Modanesi Sara<sup>2</sup>, Massari Christian<sup>2</sup>, Raes Dirk<sup>1</sup>, Kumar Sujay V.<sup>3</sup>, and De Lannoy Gabrielle J. M.<sup>1</sup>

<sup>1</sup>Department of Earth and Environmental Sciences, KU Leuven, Heverlee, Belgium

<sup>2</sup>Research Institute for Geo-hydrological Protection, National Research Council, Perugia, Italy

<sup>3</sup>Hydrological Science Laboratory, NASA Goddard Space Flight Center, Greenbelt (MD), USA

**Correspondence:** Louise Busschaert (louise.busschaert@kuleuven.be)

**Abstract.** Land surface and crop models both simulate irrigation, but they differ in their approaches, primarily because they were originally developed for distinct purposes and scales. Through an example case study in a highly irrigated region, this research helps to better understand the gap between these models and the complexity of irrigation modeling. More specifically, irrigation was estimated over the Po Valley (Italy) at a 1-km<sup>2</sup> spatial resolution using (i) a crop model, AquaCrop, and (ii) a land surface model, Noah-MP. Both models were run with sprinkler irrigation using a similar setup within NASA's Land Information System. Irrigation estimates were evaluated at the pixel and basin scale, using in situ and satellite-based reference data. In addition, surface soil moisture (SSM), vegetation, and evapotranspiration (ET) estimates were compared with satellite retrievals.

Noah-MP has on average higher annual irrigation rates (434 mm yr<sup>-1</sup>) than AquaCrop (268 mm yr<sup>-1</sup>), mainly because Noah-MP simulates more irrigation water losses (not consumed by transpiration) via runoff, interception, and soil evaporative losses, whereas AquaCrop only accounts for soil evaporative losses. When adding representative application water losses to irrigation estimates from AquaCrop, and conveyance water losses to the estimates from both models, the irrigation estimates from both models fall within reported ranges of 500-600 mm yr<sup>-1</sup>. For the field-based evaluation, Noah-MP presents large irrigation events (> 100 mm per event) and less interannual variability than AquaCrop. Two-week averaged SSM estimates from both models agree well with downscaled estimates from the Soil Moisture Active Passive (SMAP) mission, with spatially averaged unbiased root mean square differences of 0.05 and 0.04 m<sup>3</sup> m<sup>-3</sup> for AquaCrop and Noah-MP, respectively. Both models show limitations in terms of vegetation and ET modeling, mainly due to simplistic vegetation modules and suboptimal parameterization in both models. The results highlight the complexity of irrigation modeling due to its anthropogenic nature, and also show the need for better observations to validate and guide model estimates: reference irrigation data are sparse and satellite retrievals under irrigated conditions are quite uncertain.

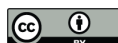

## 1 Introduction

Irrigation is a critical component of the hydrological cycle, representing more than 70% of water withdrawals worldwide (Campbell et al., 2017). This affects the Earth system by changing surface water, carbon, and energy partitioning, translated into changes in surface temperature, precipitation, vegetation production, and hydrological and biogeochemical cycling in general (McDermid et al., 2023). During the last decades, irrigated areas have expanded and water demand has increased on a global scale (Wada et al., 2011), and also in Europe (Liu et al., 2016b). The growing population and climate change might further increase the demand for irrigation water (Döll and Siebert, 2002; Fisher and Koven, 2020; Wada et al., 2013). Therefore, water use tends to become more regulated, making irrigation increasingly interesting to monitor (Knox et al., 2012; Molle and Sanchis-Ibor, 2019).

The current knowledge on regional to global irrigation is acquired through a combination of surveys and statistics (FAO/AQUASTAT; <https://www.fao.org/aquastat/en/>), remote-sensing-based observations (Massari et al., 2021), and process-based models (McDermid et al., 2023). Numerous modeling studies have provided estimates of irrigation on the regional (e.g. Wriedt et al., 2009) and global scale (model intercomparisons provided by e.g. Elliott et al., 2014; Puy et al., 2021), but they come with large uncertainties (McDermid et al., 2023; Puy et al., 2021; Wada et al., 2013). The quality of the input data (soil and vegetation parameters, meteorological forcings) is the first source of uncertainty. The second one is related to structural model assumptions. For instance, many models rely on a rootzone moisture deficit approach, keeping the rootzone water content between a user-defined threshold and field capacity (Pokhrel et al., 2016). Despite their uncertainty, models are able to provide continuous spatial and temporal estimates and therefore remain essential to understand the Earth processes and to make the link to other land surface components. Specifically, irrigation is typically estimated with either land surface models (LSMs) or crop models.

LSMs simulate the processes at the Earth surface with the main goal to support atmospheric and climate modeling, by providing the lower atmospheric boundary conditions (Fisher and Koven, 2020; Pokhrel et al., 2016). A key objective is to provide accurate estimates of the turbulent fluxes from the land towards the atmosphere (e.g. the evapotranspiration; ET). Next to their use in coupled land-atmosphere systems, LSMs have been widely used for offline simulations. Originally, LSMs were mainly concerned with the calculation of surface energy and water fluxes, but these models have grown in complexity, with modeling advances for e.g. vegetation, snow, soil moisture, and more recently, the implementation of crop and irrigation modeling (Fisher and Koven, 2020). The LSMs were developed for coarse spatial resolutions ( $0.5\text{--}2^\circ$ ) and have been gradually used at finer resolutions (Fisher and Koven, 2020), but they most often do not resolve individual fields. The irrigation modeling thus does not aim to exactly reproduce agricultural practices, but has been included in LSMs to better simulate the water balance, thereby improving all estimates of water, energy, and carbon fluxes. Despite its importance, irrigation remains often unmodeled or oversimplified (McDermid et al., 2023). Several studies attempted to estimate irrigation, sometimes including remote sensing observations, using e.g. the Noah model (Lawston et al., 2015), Noah model with multiparameterization (Noah-MP; Niu et al., 2011) (De Lannoy et al., 2024; Modanesi et al., 2022; Nie et al., 2022; Zhang et al., 2020), the community land model (CLM; Lawrence et al., 2019) (Leng et al., 2013; Yao et al., 2022), the ORganizing Carbon and Hydrology In Dynamic EcosystEms (ORCHIDEE) model (Krinner et al., 2005) (de Rosnay et al., 2003; Arboleda-Obando et al., 2023),



55 and the Variable Infiltration Capacity (VIC) model (Liang et al., 1994) (Droppers et al., 2020). These studies predominantly used a soil moisture deficit method to apply sprinkler irrigation, aiming to restore the root zone to field capacity (occasionally incorporating a maximum irrigation rate; Zhang et al., 2020), or use a different application amount based on parameters. The irrigation is then typically added to the precipitation.

Crop models have a different objective than LSMs: they are designed to be used at the field scale and to support management decisions and policies (Jones et al., 2017). Unlike LSMs, their primary goal is not providing accurate hydrological fluxes and storages, but predicting yield and other relevant variables to support management decisions (e.g. irrigation, nutrients). Given the fact that a detailed representation of the soil water dynamics is not a priority and merely serves to compute stresses to crop development, crop models often rely on a more simplified description, typically bucket models (Romano et al., 2011; Raes, 2002). In addition, irrigation is a key component and not an addition to the model to better represent the water balance. 60 Therefore, several crop models offer a variety of irrigation practices (e.g. sprinkler, drip, flood), parameters (e.g. soil moisture threshold, fixed time interval between applications), and also enable to estimate the net irrigation requirements. While LSMs have been pushed to higher resolutions or downscaled applications, there has been a recent trend to upscale crop models to provide regional estimates of biomass, yield, and even irrigation (Busschaert et al., 2022; de Roos et al., 2021; Eini et al., 2023; Mialyk et al., 2024; Pasquel et al., 2022). In the context of regional irrigation modeling, studies have typically attempted to estimate the net irrigation requirements (and not the true applications), at regional (e.g. Guerra et al., 2007), continental (Wriedt et al., 2009), and global scales.

Both LSMs and crop models have different original purposes and scales, but they can serve the same application, namely, to estimate irrigation regionally. The objective of this study is to evaluate irrigation estimates and other variables from a crop model and an LSM at the regional (basin) and pixel scale (field-based evaluation). Two well-established models in their respective domains, both including irrigation modeling, are compared and evaluated: AquaCrop, known as a relatively simple and robust crop model, and Noah-MP, a widely used LSM. More specifically, AquaCrop v7.0 (Raes et al., 2009; Steduto et al., 2009), and Noah-MP v4.0.1 (Niu et al., 2011) are run within NASA's Land Information System (LIS; Kumar et al., 2006, 2008) over one of the most intensively irrigated regions in Europe: the Po Valley (Italy). Irrigation, soil moisture, vegetation, and evapotranspiration (ET) estimates from both models are compared with in situ data and satellite retrievals. For the first time, 80 regional irrigation is estimated with AquaCrop embedded into LIS. Both AquaCrop and Noah-MP have been used to estimate irrigation in previous studies in their respective scientific communities. By confronting both model outputs and evaluating them against reference data for the same study area, we aim to highlight the gap between the models and their strengths, weaknesses, and implications for irrigation modeling at large scale. The paper is organized as follows: Section 2 describes the study domain, the model setup, and the validation data; Section 3 presents and discusses the results first at the basin scale, and then in more detail with a field-based evaluation, followed by a broader discussion on the limitations and possible improvement pathways for irrigation modeling and its validation (Section 4). Finally, the main findings of the study are summarized in the conclusions (Section 5).



## 2 Data and methods

### 2.1 Study domain

90 The Po Valley, located in the Po river basin, is the most important economic region in Italy, as it is one of the most intensive agricultural areas in the country. Figure 1a shows a map of the region with the Italian part of the Po basin delineated in black. The area presents mainly a humid subtropical climate according to the Köppen classification, with long and warm summers, making it a highly productive agricultural area. Annual precipitation rates vary between 750 mm yr<sup>-1</sup> in the valley, to 1200 mm yr<sup>-1</sup> at higher altitudes. During the last decade, the region has suffered from an increase in droughts, which are likely to become common in the future (Avanzi et al., 2024; Bonaldo et al., 2022; Montanari et al., 2023). The area extensively relies on irrigation, predominantly employing surface irrigation techniques such as channels, complemented by the use of sprinklers. Collectively, these methods irrigate more than 75% of the region, according to Zucaro (2014). An important area in the northwestern part of the valley is mainly relying on flood irrigation (paddy rice) (Zucaro, 2014). Drip irrigation only represents a small fraction of the irrigation systems available in the Po Valley and is used mainly for orchards. Common summer and winter crops are cultivated, as well as fruit trees (<https://sites.google.com/arpae.it/servizio-climatico-icolit/home?authuser=0>, last access 30 September 2024).

The specific area considered in this study consists of irrigated croplands at a 0.01° x 0.01° lat-lon spatial resolution. Cropland grid cells are derived from the 2019 Copernicus Global Land Service (CGLS) land cover map (Buchhorn et al., 2020), which is based on optical observations from the Proba-V satellite. This land cover map was originally provided at a 100 m resolution. A 0.01° grid cell is defined as cropland if it is the dominant land cover class. Irrigated areas are derived from the Global Rain-fed, Irrigated and Paddy Croplands circa 2005 (GRIPC; Salmon et al., 2015) map. The original resolution of the GRIPC map is 500 m, in which the land is classified into (1) rainfed, (2) irrigated, and (3) paddies. A 0.01° grid cell is considered as fully irrigated if at least 50% of the 500-m GRIPC grid cells within it are classified as ‘irrigated’. Grid cells that meet both conditions (cropland and irrigation) are represented by the dark blue color in Figure 1a. Note that paddy areas (from the GRIPC map) are not included in this study; they are mainly present in the northwest part of the cropland patch, west and south of the large built-up area (Milan). Furthermore, clay soils were masked because AquaCrop only takes into account this specific texture class to simulate basin irrigation, specifically for paddy rice. For this purpose, AquaCrop clay soil parameters present a very low saturated hydraulic conductivity, and sprinkler irrigation would then lead to significant runoff losses that are unrealistic. These regions were found to be dominated by rice (<https://sites.google.com/arpae.it/servizio-climatico-icolit/home?authuser=0>, last access 30 September 2024) with infiltration (or furrow) irrigation (Zucaro, 2014) and are mainly located in the eastern part of the Po Valley. A soil texture map of the region can be found in De Lannoy et al. (2024).



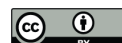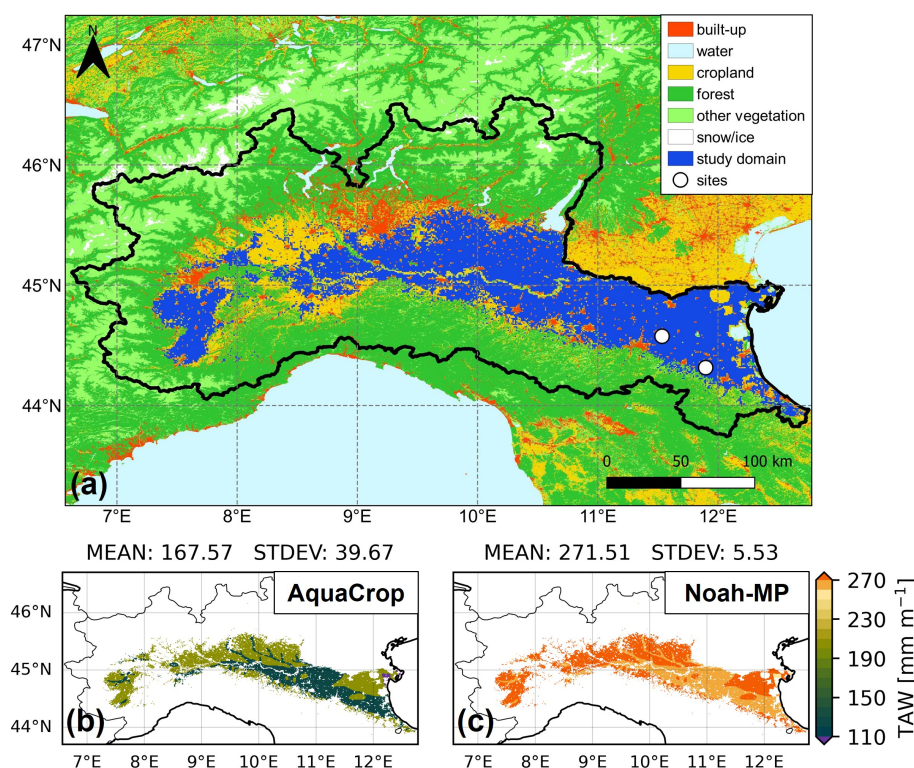

**Figure 1.** (a) Map of study domain showing a combination of the different **CGLS land cover classes and the GRIPC irrigation classification**. The rainfed cropland class and paddy rice are shown in yellow, different forest types are aggregated into one forest class in dark green, and the remaining vegetation classes are in light green. The dark blue areas correspond to irrigated cropland (excluding paddies) of interest to this study. The Budrio and Faenza sites are marked with white dots. (b) and (c): maps of the TAW [mm m<sup>-1</sup>] (for a rootzone depth of 1 m) derived from the SHPs of each model, and for irrigated cropland only.

## 2.2 Models setups

### 2.2.1 General

The Noah-MP and AquaCrop model were run for 8 years covering the years 2015 through 2022 after spinup (10 years for Noah-MP, 5 years for AquaCrop given that the soil moisture for the latter model reaches field capacity every winter in the study region). Model output is produced for each day. AquaCrop runs at a daily resolution, whereas Noah-MP runs at a 15 min resolution but the output is averaged per day. Both models are run within NASA's LIS (Kumar et al., 2006, 2008) version 7.4, with the same texture and meteorological input. This subsection discusses the general settings common to both models. Table 1 shows the main differences. The model-specific settings and the definition of the growing season (i.e. period when irrigation is allowed) are presented in the next subsections.

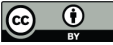

**Table 1.** Important model differences affecting irrigation.

|                                        | AquaCrop                                  | Noah-MP                                                  |
|----------------------------------------|-------------------------------------------|----------------------------------------------------------|
| Simulation timestep                    | 1 day                                     | 15 min                                                   |
| Evapotranspiration modeling            | ET <sub>0</sub> input derived from MERRA2 | Simulated ET output                                      |
| Soil physics                           | BUDGET model                              | Richards equation                                        |
| Soil hydraulic parameters              | From AquaCrop (Raes et al., 2023)         | From Noah-MP (Cosby et al., 1984; Chen and Dudhia, 2001) |
| Irrigation runoff losses               | Controlled only by $K_{sat}$              | Yes, BATS scheme (Yang and Dickinson, 1996)              |
| Canopy interception evaporation losses | No                                        | Yes                                                      |
| Growing season                         | Based on CC                               | Based on $GVF$                                           |

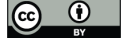

The models were forced with the Modern-Era retrospective analysis for Research and Applications version 2 (MERRA2; Gelaro et al., 2017) having an original spatial resolution of  $0.5^\circ$  lat x  $0.625^\circ$  lon and downscaled to the resolution of this study via bilinear interpolation. The temporal resolution of the data is hourly. AquaCrop requires the daily  $ET_0$  as input, which is derived from the **MERRA2 forcings using the Penman-Monteith equation** (Allen et al., 1998) as in de Roos et al. (2021).

130 The soil texture classes were assumed to be homogeneous for the whole profile, identical for both models, and derived from the Harmonized Soil World Database (HWSD) v1.21. However, each model uses its own lookup tables to map the mineral soil texture to different estimates of associated soil hydraulic parameters (SHP), i.e. the water content at saturation  $\theta_{sat}$ , at field capacity  $\theta_{FC}$ , at wilting point  $\theta_{WP}$ , and the saturated hydraulic conductivity,  $K_{sat}$ . Unlike other studies that improved the soil hydraulic parametrization for bucket-type models (e.g. Romano et al., 2011, 2025), in this study, the prescribed SHPs  
135 are used for each soil texture class without considering spatial variation, as is commonly done for large-scale simulations (De Lannoy et al., 2014; Kishné et al., 2017). Furthermore, soil organic carbon is not explicitly accounted for. For AquaCrop, indicative values of the SHPs are provided for each soil texture class (Raes et al., 2023), which are inherited from field-based applications (higher  $\theta_{WP}$  and lower  $\theta_{FC}$ ), whereas Noah-MP has been developed and calibrated with different  $\theta_{FC}$  and  $\theta_{WP}$  values, defined by Chen and Dudhia (2001). More specifically, the Noah-MP SHPs are based on Cosby et al. (1984) and further  
140 adapted to intentionally increase total available water (TAW; also referred to as plant-available water) in the context of large-scale simulations by Chen and Dudhia (2001). Because of the inherent characteristics of the models, each model requires its own parameter set, which is further discussed in Section 4.2. **No groundwater table, i.e. free drainage, was considered** for both models, because the surface soil layers are generally disconnected from the deeper groundwater in the Po Valley, especially in the summer and over non-clay soils (excluded from this study).

145 Because each texture class has associated fixed  $\theta_{WP}$  and  $\theta_{FC}$  parameters, each soil texture class also has an associated TAW value, which varies dynamically with the active root zone and is calculated as follows:

$$TAW = 1000 * (\theta_{FC} - \theta_{WP}) * RZ \quad (1)$$

where  $RZ$  is the rootzone depth [m], which is dynamic in both AquaCrop and Noah-MP (see next sections for more details). Figure 1b and c show the TAW over the domain for each model (i.e. set of SHPs) and is expressed for 1 m of rooting depth  
150 ( $RZ = 1$  m), to show the differences between the models. Across the different soil classes present in the domain, the TAW ranges are **80-200 and 255-276 mm m<sup>-1</sup>** for AquaCrop and Noah-MP, respectively. In both models, the TAW is a key parameter for the irrigation modeling, as it is used to determine: (1) when irrigation should be applied, and (2) the amount of water required, as it is assumed that an irrigation application fills the root zone to field capacity. More specifically, irrigation is triggered based on the moisture availability  $MA$  [-], defined as the rootzone soil moisture content relative to the TAW:

$$155 \quad MA = \frac{1000 * (\theta - \theta_{WP}) * RZ}{TAW} \quad (2)$$

where  $\theta$  [m<sup>3</sup>m<sup>-3</sup>] is the actual rootzone water content. The irrigation application is computed when the  $MA$  falls below a threshold ( $MA_{irr}$ ) of 0.45, following Modanesi et al. (2022) who found that this threshold was optimal to follow the irrigation dynamics over the Budrio and Faenza field (see Section 2.3.4) using Noah-MP. When the  $MA_{irr}$  threshold is reached, the



irrigation amount applied corresponds to the water required to fill the root zone to field capacity. In the region, the rooting depth varies mainly from 50 to 150 cm, with deeper root zones at the edges of the Po River (Rivieccio et al., 2020). Therefore, the maximal rootzone depth was set to 1 m in both models but the actual rooting depth varies with the dynamic vegetation and therefore depends on the model. The period during which irrigation can be triggered (growing season) is explained in Section 2.2.4.

### 2.2.2 AquaCrop

AquaCrop v7.0 (Raes et al., 2009; Steduto et al., 2009) within LIS was used for the simulations of this study. The official FAO source code is open source for version 7 and higher (<https://github.com/KUL-RSDA/AquaCrop/>).

In the context of a coarse-scale resolution study, it is common to use a spatially homogeneous generic crop type aiming at representing a biomass evolution that follows realistic dynamics within one grid cell (Mirschel et al., 2004; de Roos et al., 2021; Ingwersen et al., 2018), instead of specific crop types, which are more appropriate for high-resolution (field-level) studies. Therefore, the vegetation is parameterized as in de Roos et al. (2021), with a C3 generic crop transplanted each year on January 1<sup>st</sup> and grown until the start of senescence in late August. Spatial simulations with the generic crop were found to perform reasonably well when comparing soil moisture and biomass estimates with remote sensing products and in situ data (Busschaert et al., 2022; de Roos et al., 2021). Because the focus of this study is on irrigated areas, the choice was made to define a near-optimal soil fertility (similarly to Busschaert et al., 2022) since it is assumed that irrigated fields are well managed. Fertility stress is established to allow 80% of the achievable biomass. The yearly CO<sub>2</sub> concentrations from the Mauna Loa station (Hawaii, US) are used.

For soil moisture, AquaCrop relies on the computation of an empirical water balance model (BUDGET; Raes, 2002), written as follows:

$$\Delta S = P + Irr - E_{soil} - Tr - RO - Dr \quad (3)$$

where all flux components are water volumes per area, expressed in mm per time step of 1 day [mm d<sup>-1</sup>].  $\Delta S$  is the change in soil water storage over the time step. Precipitation ( $P$ ) and irrigation ( $Irr$ ) are the incoming fluxes. The soil evaporation ( $E_{soil}$ ), the transpiration ( $Tr$ ), the surface runoff ( $RO$ ), and the drainage ( $Dr$ ) are the outgoing fluxes. The soil layer is divided into 12 compartments of equal size (0.1 m) to reach the total profile depth of 1.2 m (de Roos et al., 2021, 2024). The water balance is computed over the entire soil profile (12 compartments) and the change in storage  $\Delta S$  for a certain time period is expressed as follows:

$$\Delta S = \sum_{i=1}^n \Delta \theta_i * D_i * 1000 \quad (4)$$

with  $n$ , the number of compartments (12),  $\theta_i$  [m<sup>3</sup>m<sup>-3</sup>], the water content in compartment  $i$ , and  $D_i$  [m], the corresponding depth of the compartment. The sum of  $E_{soil}$  and  $Tr$  in Equation 3 forms the actual ET. The computation of ET relies on the FAO approach and is described in Appendix A1. AquaCrop does not consider canopy evaporation (or leaf interception loss)



190 explicitly, but it is indirectly included because the intercepted water is assumed to infiltrate into the surface soil, from where  
it can be lost by evaporation.  $RO$  consists of the water that does not infiltrate the soil and depends on a curve number and the  
 $K_{sat}$ . However, the infiltration of irrigation water is only limited by  $K_{sat}$  and not by the CN, since it is assumed that irrigation  
is well managed in AquaCrop. Since  $K_{sat}$  generally only limits the infiltration over clay soils, and pixels with clay soils are not  
included in this study (see Section 2.1), there will be no  $RO$  loss following irrigation. Finally,  $Dr$  (or deep percolation losses)  
195 occurs when the soil water content exceeds  $\theta_{FC}$ .

The irrigation application depth (irrigation amount per event;  $Irr_{appl}$  in [mm d<sup>-1</sup>]) can be written as follows:

$$Irr_{appl} = 1000 * (\theta_{FC} - \theta) * RZ [d^{-1}] \quad (5)$$

with  $\theta$  [m<sup>3</sup> m<sup>-3</sup>] being the rootzone water content before irrigation, already including the precipitation and potential ET of that  
day. The rootzone depth  $RZ$  [m] is defined by the crop parameters and starts at 0.1 m on January 1<sup>st</sup> to reach its maximum  
200 value ( $RZ_{max}$ ) of 1 m at the end of March (80 calendar days).

### 2.2.3 Noah-MP

Noah-MP v4.0.1 (Niu et al., 2011) coupled to NASA LIS was run with the default LIS recommended parameters, as described  
in the LIS user manual except for the radiation transfer scheme and the dynamic vegetation option to allow for a dynamic  
green vegetation fraction ( $GVF$  [-]). The latter enables a dynamic definition of the growing season in line with AquaCrop  
205 (see Section 2.2.4). Note that these options were used in irrigation modeling studies using Noah-MP v3.6 in LIS (Modanesi  
et al., 2022). The vegetation parameterization is spatially homogeneous over the study domain, since only one land cover class  
(croplands) is considered. The main Noah-MP options used in this study are shown in Appendix B.

Noah-MP solves the energy and water balances. Similarly to AquaCrop (Equation 3), the water balance for Noah-MP can  
be written as follows:

$$210 \quad \Delta S = P + Irr - E_{soil} - E_{canop} - Tr - RO - Dr \quad (6)$$

In contrast to AquaCrop, Noah-MP estimates the ET fluxes based on the energy and water balances (Appendix A2), also  
considering the canopy evaporation ( $E_{canop}$ ). Noah-MP solves the Richards' equations to compute vertical soil moisture  
distribution at a user-defined time interval (typically less than an hour, here chosen at 15 min) and in 4 soil layers. The depths  
of the layers are 0.1, 0.4, 0.6, and 1 m, from top to bottom. Only the top 1 m is considered for the computation of the  $Tr$ . Note  
215 that water can also be stored in snow, but this is not considered in the  $\Delta S$  of this study, since irrigation periods can be assumed  
to be snow-free.

To simulate irrigation, Noah-MP is coupled to an irrigation module developed by Ozdogan et al. (2010). When the  $MA_{irr}$   
threshold is reached, the  $Irr_{appl}$  (Equation 5) is calculated at 06:00 AM (local time), but the rainfall and potential ET of the  
rest of that day are not yet considered in the estimation of the rootzone water content  $\theta$  before irrigation.  $RZ$  in Noah-MP is  
220 defined by the  $GVF$ :

$$RZ = RZ_{max} * GVF \quad (7)$$



with  $RZ_{max}$ , the maximum rooting depth [m] set to 1 m. The  $GVF$  is dynamically modeled from the leaf area index (LAI,  $m^2 \cdot m^{-2}$ ) with the following equation:

$$GVF = 1 - e^{-0.52 \cdot LAI} \quad (8)$$

225 The  $Irr_{appl}$  is equally distributed at each model time step (15 min) and applied from 06:00 to 10:00 AM (local time) and added to the precipitation.

## 2.2.4 Growing season

For both model setups, a dynamic start of the growing season was defined. In Noah-MP, the growing season, or the time when irrigation can be triggered in the model, was originally defined by Ozdogan et al. (2010) as the period where the  $GVF$  is  
230 larger than a certain threshold. This threshold is defined as 40% of the range between the minimum and maximum  $GVF$  ( $GVF_{min}$  and  $GVF_{max}$ ) and was originally calibrated by Ozdogan et al. (2010) and used in several studies (Lawston et al., 2017; Lawston-Parker et al., 2023; Modanesi et al., 2021; Sharma et al., 2022).  $GVF_{min}$  and  $GVF_{max}$  were defined based on a deterministic run with irrigation by taking the average minimum and maximum  $GVF$  over the 8 years. In AquaCrop, the fraction of land covered by vegetation, the canopy cover (CC), is used to simulate the crop development, with the minimum  
235 CC (or initial CC) equal to 0.1 [-] and a maximum CC of 0.85, both being crop parameters (developed by de Roos et al., 2021). By definition, the CC should correspond to the  $GVF$  in Noah-MP. The threshold for the growing season for both models can then be summarized as follows:

$$veg_{irr} = veg_{min} + 0.4 * (veg_{max} - veg_{min}) \quad (9)$$

where  $veg$  [-] corresponds to the  $GVF$  and CC for Noah-MP and AquaCrop, respectively. The  $GVF$  in Noah-MP is based on  
240 the dynamically simulated LAI via an exponential relation (Equation 8) whereas the CC in AquaCrop is the driving variable and is based on the climatic and environmental conditions, as well as crop parameters defining the crop growth stages and effects of stresses (fertility, temperature, water).

## 2.3 Evaluation

To evaluate the simulations, satellite products of soil moisture, vegetation, and ET are used, along with field-level (in situ)  
245 irrigation data. Note that all these reference products have their uncertainties, in particular over irrigated areas (see Section 4). The usage of coarse-scale satellite retrievals is considered to complement the in situ (field-level) evaluation, as the latter might lead to representativeness errors when used to evaluate coarser-scale simulations. Due to constraints in the temporal frequency of validation products and inevitable mismatches between the modeled timing of irrigation and the human decision to irrigate, the evaluation is performed on temporally aggregated values.



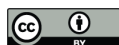

### 250 2.3.1 Soil moisture

The surface soil moisture (SSM) estimates were evaluated against downscaled SSM from the Soil Moisture Active Passive (SMAP) mission, referred to as the NASA SMAP 1-km product (Fang et al., 2022). These SMAP SSM retrievals were down-scaled using thermal and optical data and should therefore be able to detect the presence of irrigation, as proven for similar downscaled products (Merlin et al., 2013). The data perform better in low and mid-latitudes and during warm months (Fang et al., 2022). The product sometimes fails to capture localized events, but all downscaled products face that limitation to some extent (Brocca et al., 2024). The SMAP 1-km product is provided on an EASEv2 grid and was reprojected to the model grid with a nearest neighbor function. Both descending (06:00 AM) and ascending (06:00 PM) observations were considered, and when both were available on the same day, the arithmetic mean was taken. The first soil layer moisture from both models was used for the evaluation, representing the top 10 cm of the soil. To reduce the impact of short-term errors in the irrigation timing, the SSM estimates were averaged over 15 days for the evaluation without first cross-masking the data. The SSM is evaluated for the months from March through September, as AquaCrop simulates an annual crop with senescence in September, and presents no vegetation thereafter. The SSM evaluation time ranges from 1 April 2015 (start of available SMAP observations) through 29 September 2022.

### 2.3.2 Vegetation

To evaluate the vegetation estimates of both models, the Copernicus Global Land Service (CGLS) Dry Matter Productivity (DMP) was used (Buchhorn et al., 2020). The product offers DMP 10-daily average DMP observations retrieved with Proba-V (before August 2020) and Sentinel-3 (from August 2020) using the fraction of absorbed photosynthetically active radiation (fAPAR; Monteith, 1972; Penman, 2003). These retrievals are known to not capture the short-term water stresses accurately. However, since this study concerns only irrigated areas, water stress should be minor compared to rainfed areas. The units of the DMP are  $\text{kg ha}^{-1} \text{ d}^{-1}$ , averaged over 10 days. The data were resampled from a 300-m resolution to the model grid via averaging. The DMP was used to evaluate the 10-day averaged daily biomass production from AquaCrop, derived from the cumulative biomass, and the net primary production (NPP) from Noah-MP. The daily biomass production from AquaCrop is directly comparable to the DMP, whereas the NPP (expressed in  $\text{gC m}^{-2} \text{ d}^{-1}$ ) was converted to DMP by multiplying the value by 2 since in the derivation of the DMP product, it is assumed that the dry matter is composed of 50% of carbon (Swinnen et al., 2021). Similarly to the SSM, the vegetation was evaluated for the months March through September, and also separately for the first half of the year (January-June) corresponding to the period when the AquaCrop CC increases (before reaching a plateau in the summer).

### 2.3.3 Evapotranspiration

The ET was evaluated using the SenET product providing daily estimates at a 100-m spatial resolution from 2017 through 2021 (Bartkowiak et al., 2023). The ET is derived using the two-sourced Energy Balance model using Sentinel-2 surface reflectance and Sentinel-3 thermal infrared imagery. The SenET algorithm is relatively recent but has shown potential for



irrigation management (Bartkowiak et al., 2024; Chintala et al., 2022; Spiliotopoulos et al., 2023). The data were reprojected to the model grid of this study by averaging. Similarly to the SSM evaluation, the ET evaluation is performed for the months March through September, on 15-day averages (expressed in  $\text{mm d}^{-1}$ ) to reduce the impact of short-term errors in irrigation timing.

### 2.3.4 Irrigation

Field-based irrigation data is available for three sites and was collected for the ESA IRRIGATION+ project. The Budrio fields consist of five plots within one LIS pixel, covering three irrigation seasons from 2015 through 2017 (top white dot in Figure 1). The daily irrigation rates (in  $\text{mm d}^{-1}$ ) were spatially averaged to compare with the irrigation estimates from the models. The Faenza fields (bottom white dot in Figure 1) are separated into two districts: Faenza San Silvestro (covering 3 LIS pixels), and Faenza Formellino (8 pixels). These in situ irrigation rates cover the growing seasons from 2016 through 2021. In this case, the LIS output of multiple pixels was averaged for the fields in each district. Irrigation is evaluated for the months March through September and is temporally averaged from weekly to seasonal time intervals.

Over the entire Po Valley, the average irrigation water use reported by water management agencies is around  $500\text{-}600 \text{ mm yr}^{-1}$  ([https://suwanu-europe.eu/wp-content/uploads/2021/05/State-of-play\\_Po-River-Basin-Italy.pdf](https://suwanu-europe.eu/wp-content/uploads/2021/05/State-of-play_Po-River-Basin-Italy.pdf), last access 30 September 2024). Spatially distributed irrigation estimates are provided by Dari et al. (2023). The estimates are derived from inverting the soil water balance and using Sentinel-1 SSM retrievals. As the first regional irrigation product for the Po Valley, it is subject to notable uncertainties, especially since the algorithm was validated with limited in situ data (Faenza fields). The evaluation against these data was performed only for the summer months (June, July, August), since the data from Dari et al. (2023) contain suspicious irrigation events in winter and outside of the growing season.

### 2.3.5 Metrics

The SSM, vegetation, and ET are evaluated in terms of Pearson correlation (R), bias, root mean square difference (RMSD), and unbiased RMSD (ubRMSD), with independent satellite data. Irrigation is evaluated in terms of R, bias, and RMSD with in situ reference data and the regional irrigation data from Dari et al. (2023). The metrics are calculated as follows:

$$R = \frac{\sum_{n=1}^N (x_n - \bar{x})(y_n - \bar{y})}{\sqrt{\sum_{n=1}^N (x_n - \bar{x})^2 \sum_{n=1}^N (y_n - \bar{y})^2}} \quad (10)$$

$$\text{bias} = \frac{\sum_{n=1}^N (x_n - y_n)}{n} \quad (11)$$

$$\text{RMSD} = \sqrt{\frac{1}{N} \sum_{n=1}^N (x_n - y_n)^2} \quad (12)$$

$$\text{ubRMSD} = \sqrt{\text{RMSD}^2 - \text{bias}^2} \quad (13)$$

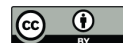

where  $x$  is the value of the simulated land surface variable from AquaCrop or Noah-MP,  $y$  is the reference value (observation),  
310 and  $N$  is the number of reference data in time ( $n = 1, \dots, N$ ).  $\bar{x}$  and  $\bar{y}$  represent the temporal mean values. In addition to these  
metrics, the Pearson R of the anomalies (anomR) is calculated since the evaluated variables present strong seasonal patterns.  
The anomalies are calculated by subtracting the long-term climatology from the observations. A window size of 30 days was  
taken to calculate the climatology.

### 3 Results and discussion

#### 315 3.1 Basin-scale evaluation

##### 3.1.1 Growing season

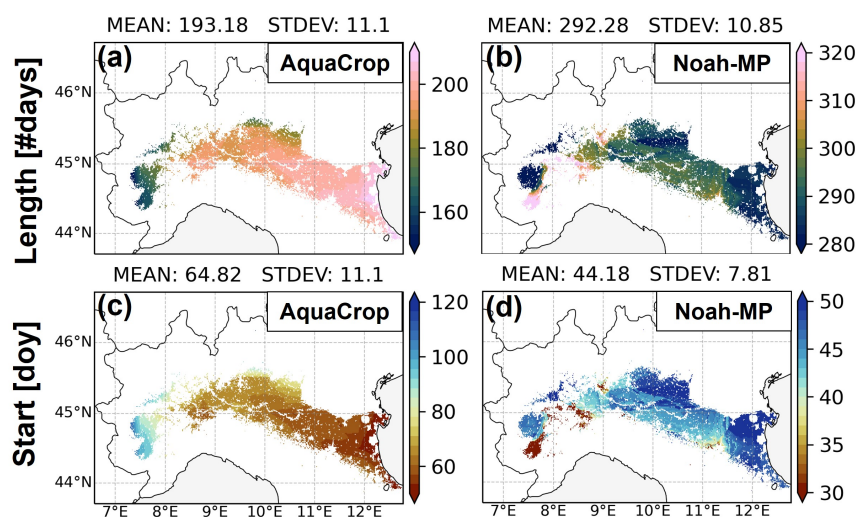

**Figure 2.** Average length in number of days [#days] and start as day of the year [doy] of the growing season over 8 years (2015-2022) for AquaCrop and Noah-MP. Note the different ranges in colorbars.

Figure 2 shows the average length (number of days) and the start of the growing season (day of year) for both models, as  
derived from the dynamic vegetation. For AquaCrop, the spatial patterns for the length and start of the growing season are  
identical (same spatial standard deviation). This is because the crop parameters related to the start and duration of senescence  
fix the end of the growing season on September 24 (September 23 for leap years). The spatial patterns of the growing season  
320 lengths for the two models are different; some areas towards the western side of the domain have a short growing season for  
AquaCrop, but they stand out with the longest growing season for Noah-MP. This can be attributed to the fact that  $GVF$  drops  
only for a short period in winter and increases rapidly to high  $GVF_{min}$  values for Noah-MP. This also explains the typical  
earlier start of the growing season for Noah-MP compared to AquaCrop. In addition to an earlier start, the season ends later



325 in the year, because irrigation causes an extended vegetation growth and harvest is not modeled (De Lannoy et al., 2024). In general, the start of the growing season shows more variability for AquaCrop, where the difference between the latest and earliest start date at one location is on average 33 days, compared to 28 days for Noah-MP.

### 3.1.2 Irrigation estimates

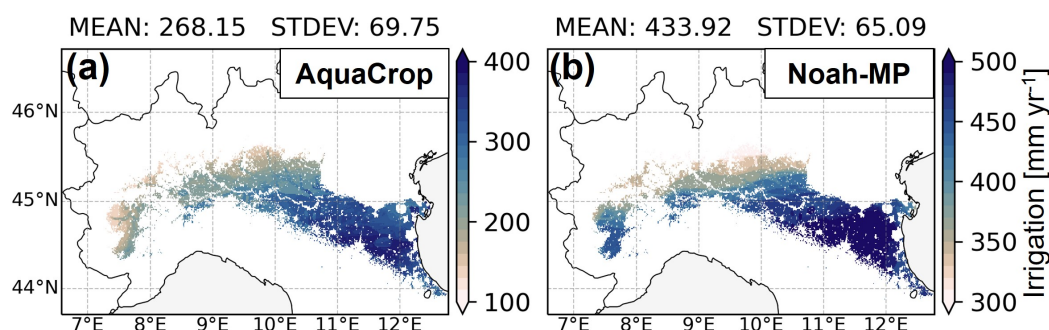

**Figure 3.** Average irrigation [ $\text{mm yr}^{-1}$ ] over the 8 years for (a) AquaCrop and (b) Noah-MP. Note the different ranges in colorbars.

The multi-year average annual irrigation rates estimated by both models are presented in Figure 3. Irrigation amounts are 330 larger for Noah-MP ( $434 \text{ mm yr}^{-1}$ ) than for AquaCrop ( $268 \text{ mm yr}^{-1}$ ). This contrast can be explained by differences in irrigation losses (not consumed by transpiration), growing season lengths, and calculation procedures between the models, and is later discussed in Section 3.1.4.

The spatial patterns in irrigation rates are similar in both models, presenting a strong north-south gradient. The main drivers for both models are radiation and precipitation, presenting similar spatial patterns (not shown). The irrigation pattern can also 335 be linked to the average growing season length (Figure 2). The upper southwestern region shows strong differences in average irrigation rates between AquaCrop and Noah-MP. In the latter, there is more vegetation and the growing season covers almost the entire year, whereas it is much shorter for AquaCrop (see Section 2.2.4) and the increase in CC occurs later in the season.

Management information of the Po Valley indicates that average irrigation rates are around  $500 \text{ to } 600 \text{ mm yr}^{-1}$  which is more than what is estimated by either AquaCrop or Noah-MP. This might be because in reality irrigation water is lost (not taken 340 up by vegetation) in various ways that the models do not, or only in a limited way, account for. AquaCrop aims to estimate a net irrigation amount and only accounts for soil evaporation losses. Noah-MP includes the simulation of interception and runoff losses that AquaCrop does not simulate, and which are important for sprinkler irrigation. However, none of the models simulate any important percolation losses, which can be significant for surface irrigation systems (dominant irrigation method over the area). Surface irrigation (channel-type) is relatively the most inefficient irrigation system (Irmak et al., 2011) in terms of application losses, but also in terms of conveyance losses, as water is distributed through open canals. Adding a typical conveyance efficiency factor for the area (0.825; Rohwer et al., 2007) to the Noah-MP estimates would yield an average value of  $526 \text{ mm yr}^{-1}$  which is consistent with management data.

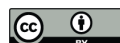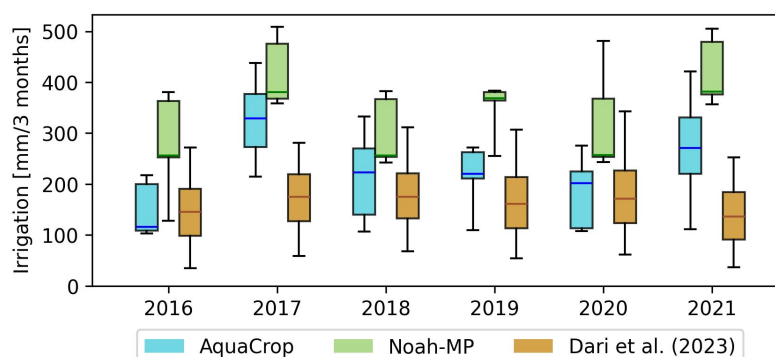

**Figure 4.** Yearly summer (JJA) irrigation [mm/3 months] for 2016 through 2021 for AquaCrop (blue), Noah-MP (green), and estimates from Dari et al. (2023). The boxes represent the irrigation values within the interquartile range (IQR), the lines in the boxes correspond to the median, and the whiskers extend to  $Q1 - 1.5 \times IQR$  and  $Q3 + 1.5 \times IQR$  or are cut off if all data points are within the interval (outliers are not shown).

Figure 4 presents spatial boxplots of the annual irrigation rates for both models along with the satellite-based retrievals from Dari et al. (2023) for the same locations (the data were cross-masked). More specifically, the interannual variability of the irrigation estimates is shown following the x-axis, and the spatial variability over the domain is represented by the extent of the boxes. First, the median irrigation follows the same variations through time for both models, with Noah-MP presenting higher amounts as seen in the average annual irrigation rates in Figure 3. Second, the spatial variability also follows the same trends for both models, with a reduced variability in 2019 due to less variation in summer precipitation and temperatures over the domain. On average, 2017 appears to be the year with the most intensive irrigation, followed by 2021, both years being very dry (Baronetti et al., 2020; Montanari et al., 2023).

The dataset by Dari et al. (2023) is a first attempt to estimate regional irrigation using satellite data, and shows, on average, lower irrigation amounts and different spatial and temporal patterns than the model estimates. The retrievals only consist of the irrigation water added to the soil, therefore not considering runoff or interception losses (included in Noah-MP) or soil evaporative losses (included in both models). Also note that our simulations assumed an irrigated fraction of 100% for irrigated pixels, which is likely not the case in reality. AquaCrop irrigation estimates are closer to the retrievals but show higher irrigation rates during dry years (e.g. 2017, 2021) whereas the reference data do not show an increase in irrigation for those years. The results presented in our study are mainly driven by the meteorological forcings and have no limitation in irrigation water usage. Observation-based datasets, such as the one presented by Dari et al. (2023) may better capture the reality, where farmers likely irrigate according to a schedule and not depending on moisture deficit thresholds (Pokhrel et al., 2016).

To better understand the models' skill at different time scales, the irrigation amounts were aggregated (sum) over different time intervals: from weekly (original resolution of the retrievals) to yearly (based on the summer months only JJA). The temporal R is then calculated between the datasets (AquaCrop, Noah-MP, and ref) for each pixel and the results are presented as spatial boxplots in Figure 5. When aggregating over longer time intervals, both models tend to show a higher correlation

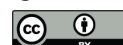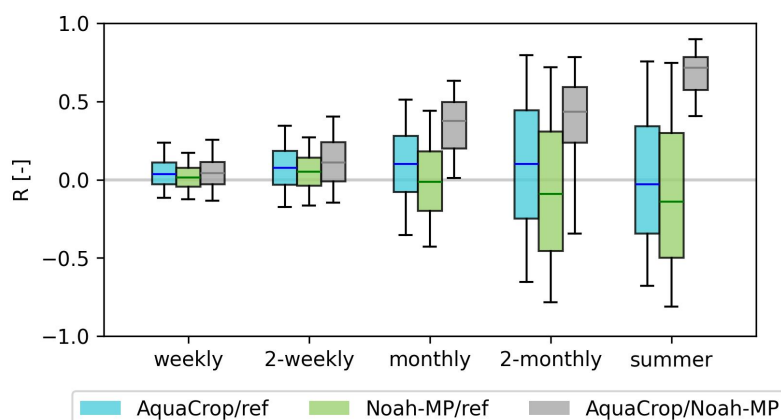

**Figure 5.** Pearson R [-] between the different irrigation estimates (AquaCrop, Noah-MP, and ‘ref’ for reference data from Dari et al. (2023)) aggregated to different time intervals and computed for the time period 2016-2021 on the summer months only (JJA). The boxes represent the irrigation values within the interquartile range (IQR), the lines in the boxes correspond to the median, and the whiskers extend to  $Q1 - 1.5IQR$  and  $Q3 + 1.5IQR$  or are cut off if all data points are within the interval (outliers are not shown).

(grey boxes), meaning that they capture the same high- and low-irrigation years. However, when computing the correlation with the reference data from Dari et al. (2023), R tends to deteriorate with increasing temporal aggregation with negative R values in several locations. If the reference data have the right temporal variability, this would prove that the models are not capturing the actual interannual variability (or the absence of interannual variability) as they mainly depend on the meteorological forcings and are not restricted by e.g. water availability. However, it will be shown that both AquaCrop and Noah-MP tend to better capture the interannual variability in irrigation when compared to in situ data (later discussed in Section 3.2), which suggests possible inaccuracies in the reference data.

### 3.1.3 Soil moisture, vegetation and ET

Figure 6 presents the evaluation of the SSM, vegetation, and ET estimates from the models with downscaled SMAP 1-km SSM, CGLS DMP, and SenET, respectively. Both observed and simulated SSM and ET are aggregated over 15 days to limit the negative impact of erroneous timing of irrigation events. The daily biomass production of AquaCrop, and the NPP of Noah-MP are averaged over 10 days to be compared to the 10-daily DMP product. For all variables, the months March through September are considered, and for DMP, an additional evaluation is provided for the months January through June.

For the evaluation with SMAP SSM, AquaCrop on average shows a higher (anom)R than Noah-MP. However, the error (ubRMSD) is significantly higher for AquaCrop, because AquaCrop SSM tends to hit the lower and upper boundaries ( $\theta_{WP}$  and  $\theta_{FC}$ ) more frequently. Several areas perform poorly in terms of ubRMSD and R for both models (metric maps shown in Appendix C). These areas correspond to the surroundings of the large cropland area that is classified as paddy in the GRIPC map of Salmon et al. (2015) and which was masked in this study. According to the CORINE land cover map (Büttner, 2014)



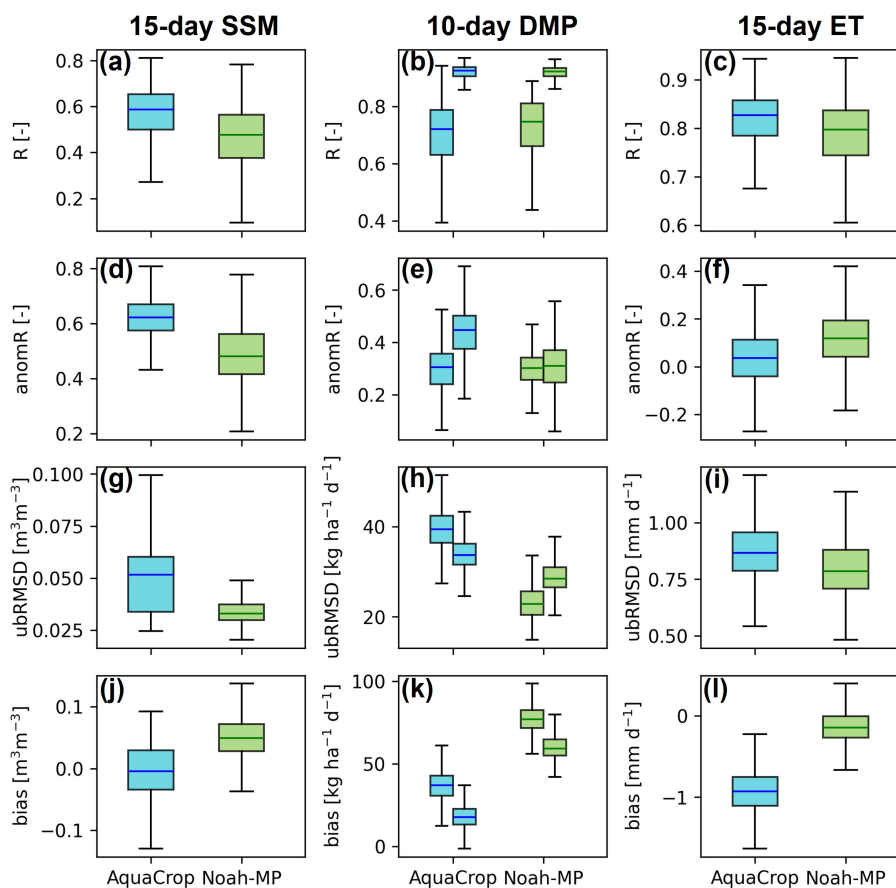

**Figure 6.** Boxplots of R, ubRMSD, anomR, and bias of AquaCrop (blue) and Noah-MP (green) simulations, comparing (i) modeled SSM with SMAP SSM, (ii) modeled vegetation with CGLS DMP, (iii) modeled ET with SenET. Metrics were computed for the months March through September 2015–2022 for SSM and vegetation, and the same months but 2017–2021 for SenET. For the evaluation with CGLS DMP, the second boxplot presents the metrics computed for the months from January through June 2015–2022.

of 2018, these low-performance regions (the triangle at the confluence of the Ticino and Po rivers, and southern Milan) are classified as rice fields also under flood irrigation (Zucaro, 2014). The irrigation practices applied in rice fields differ strongly from the sprinkler irrigation modeled by AquaCrop and Noah-MP, likely causing poor agreements. In addition, the downscaled SMAP retrievals may be uncertain over these complex areas.

For the vegetation evaluation, Noah-MP shows better skill than AquaCrop in terms of R and ubRMSD during the main growing season (March through September). Compared to this time period, AquaCrop performs significantly better during the first part of the year (January through June), where variations in DMP are mainly driven by low temperatures (below the baseline temperature defined at 8 °C for the generic crop, causing cold stress). Later in the season, when temperatures are higher, the biomass production is only limited by water stress, which only slightly affects the transpiration when the



rootzone soil moisture becomes less than 50% of TAW (close to the irrigation threshold set at 45% of TAW). Both Noah-MP and AquaCrop vegetation estimates are highly positively biased compared to the CGLS DMP. For AquaCrop, a biomass overestimation could be due to uncalibrated crop parameters, e.g. the maximum canopy cover ( $CC_{max}$ ) which is a determining factor for biomass production. A second influential factor could be the fertility stress, here chosen to be near optimal (80% of the potential biomass is produced), which may be an overestimation for the Po Valley. Previous studies have also shown strong vegetation overestimations by Noah-MP in terms of GPP, particularly over croplands (De Lannoy et al., 2024; Ma et al., 2017). Especially for irrigated land, the growing season is extended, and again, harvest is not modeled. The choice of vegetation module options in this study may have resulted in even stronger overestimations as those may not be the most optimal ones for the area (Li et al., 2022). Time series of SSM and DMP are presented and discussed in Section 3.2.

Finally, the ET evaluation against the SenET product generally shows a better agreement with the Noah-MP estimates, as shown by the higher anomR and lower ubRMSD. This result can be expected, as Noah-MP solves an energy balance to compute the ET, whereas a reference ET estimate ( $ET_0$ ) is required as input for AquaCrop. The latter model then converts the  $ET_0$  to the actual ET by using a crop coefficient ( $K_c$ ), proportional to the CC, and a stress factor ( $K_s$ ) considering heat and water stresses. More details on the ET computation for both models can be found in Appendix A. Note that AquaCrop ET estimates present an important negative bias (underestimation) compared to SenET. This bias is typically larger in spring because vegetation tends to develop later for AquaCrop. Therefore, the bias is even more severe in the colder regions, where the crop develops even later (as shown by the growing season maps in Figure 2). The spatial patterns of the metrics are similar for both models (Appendix E), with lower anomR values in the eastern part of the domain which is likely dominated by infiltration irrigation (Zucaro, 2014). Appendix F shows time series of ET estimates from both models and SenET for the three test sites.

### 3.1.4 Water balance

To better understand the similarities and differences between the irrigation estimates simulated by both models, an overview of the different water balance components is presented in Figure 7. The distribution of the fluxes (normalized by the total input or output flux) over the 8 years is shown in Figures 7a and c, while Figures 7b and d present the monthly climatology (average flux in  $\text{mm month}^{-1}$  over the 8 years). For the change in storage ( $\Delta S$ ) in Figures 7b and d, only the top 1 m layer is considered to cover the modeled maximal rooting depth and because it is mainly the first meter of soil that shows large fluctuations over time. As shown in the water balance equation of AquaCrop (Equation 3), canopy interception is not considered. Also, note that the output fluxes shown in Figures 7b and d do not always add up to the total incoming fluxes (sum of precipitation and irrigation, black line) because the climatology may not be robust enough over 8 years and snow is not accounted for in  $\Delta S$  (considered in Noah-MP but not in AquaCrop).

The results confirm the higher irrigation rates for Noah-MP presented in Figure 3. The main factor explaining those differences is that the models differ considerably in the losses of the water inputs (precipitation and irrigation), namely via surface runoff and ET. Surface runoff, similar for both models during winter, is significantly higher for Noah-MP during summer, mainly due to irrigation applications. This is not the case for AquaCrop, because runoff generation due to infiltration excess (from irrigation) can only happen if the infiltration is limited by the soil  $K_{sat}$ , but this was not a limiting factor for the dominant

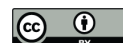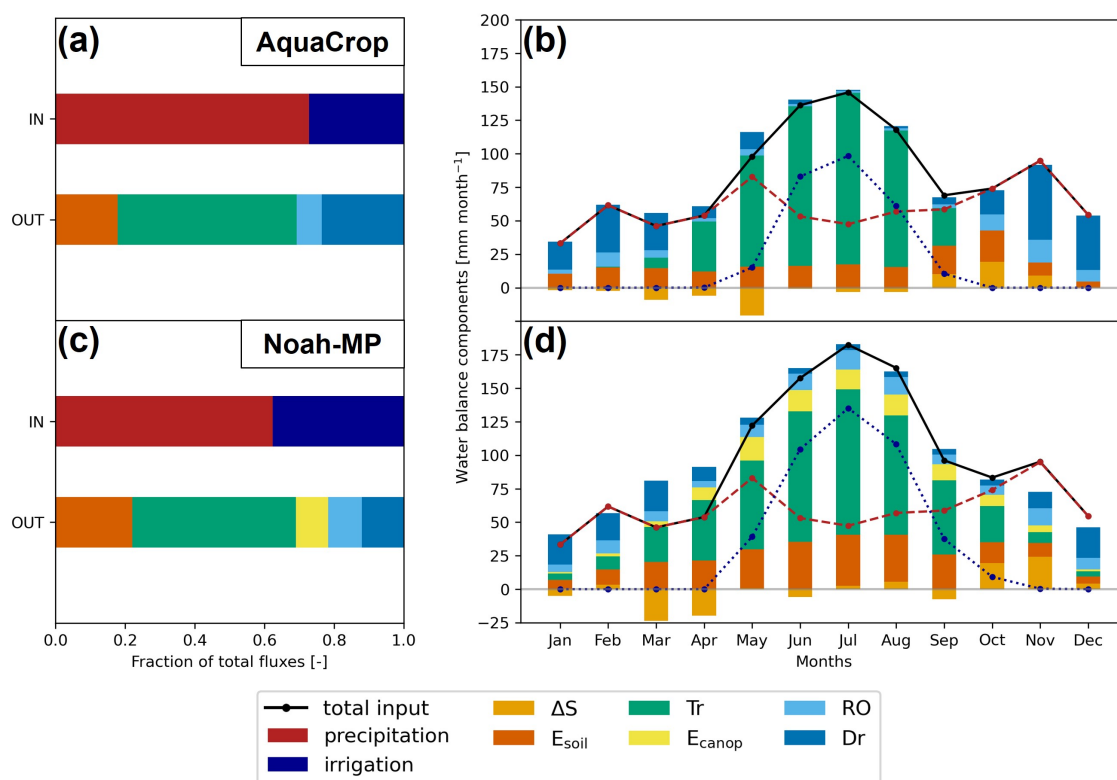

**Figure 7.** (a,c) Year-round water balance components averaged across all years and normalized by the sum of input and output fluxes for (top) AquaCrop and (bottom) Noah-MP. (b,d) Corresponding monthly water balance components. The precipitation and irrigation are represented by the dashed red lines and the dotted blue lines.  $\Delta S$  is on average  $\sim 0$  mm in a and c, whereas it can be either positive (increase in storage) or negative (decrease) in the monthly estimates of b and d.

soil textural classes of the study domain (sandy loam and silt loam). Note also that in Noah-MP, the irrigation water lost through runoff is not compensated, meaning that field capacity is never reached in the model after an irrigation event. In addition to surface runoff, the evaporative losses ( $E_{soil}$  and  $E_{canop}$ ) in Noah-MP are larger compared to AquaCrop.

The length of the growing season also contributes to the difference in the average irrigation rates. Noah-MP vegetation develops earlier, leading to increased transpiration in spring compared to AquaCrop. The root zone depletes more rapidly (negative  $\Delta S$ ) and causes more irrigation (blue dotted line in Figure 7b and d) for Noah-MP in the early season. The irrigation applications end in September for AquaCrop (due to the fixed onset of senescence) or October for Noah-MP. This induces some additional irrigation in the late season, which is not simulated by AquaCrop.

The models present differences in the ET estimates. In general, the proportion of ET, the i.e. sum of  $E_{soil}$ ,  $Tr$ , (and  $E_{canop}$  for Noah-MP only), relative to the other fluxes is larger for Noah-MP than for AquaCrop (Figure 7a and c). However, the absolute values of  $Tr$  are considerably higher for AquaCrop during the summer, even if less irrigation water is applied in

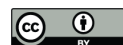

AquaCrop, which is explained by lower  $E_{soil}$ , the absence of  $E_{canop}$ , and runoff losses after irrigation. No  $Tr$  is simulated by AquaCrop during the winter months because of the absence of vegetation.  $Tr$  increases earlier for Noah-MP at the beginning of the season, which can be explained by earlier and more vegetation for Noah-MP (also resulting in a better agreement with SenET, Figure 6). This early increase in  $Tr$  leads to faster and earlier drying of the soil for Noah-MP, represented by the negative  $\Delta S$  in Figures 7b and d.  $Tr$  is also higher for Noah-MP than AquaCrop in the fall, because of vegetation senescence in late August and early September for AquaCrop. The soil water refill begins earlier compared to Noah-MP (shown by the positive  $\Delta S$  in September). Lastly, the absolute values for  $\Delta S$  also present smaller fluctuations for AquaCrop. The bottom layers of the soil profile in AquaCrop (deeper than 0.6 m) mostly remain close to  $\theta_{FC}$  due to the soil water modeling scheme.

### 3.2 Field-based evaluation

A detailed analysis was performed over the Budrio (sandy loam) site and is presented in Figure 8 for the years 2015-2017 (with 2017 being a very dry year), corresponding to the availability of the irrigation data on that site. The figure presents the (a) DMP, (b) SSM, (c) moisture availability (MA; Equation 2), and (d) irrigation and rainfall (incoming fluxes). The summary metrics on top of Figure 8a and b are computed on the entire three years presented in the time series (unlike Figure 6, which focused on select months).

In line with the basin results, the biomass of both models follows the expected seasonal cycle. AquaCrop performs reasonably during the first months of the growing season, and then keeps a slight declining plateau as soon as the maximum CC is reached. In AquaCrop, crop growth can only be affected by (1) temperature stress (heat), and (2) water stress. The variations in DMP in the early season are due to temperature (cold stress), and some decreases in DMP are captured by AquaCrop (e.g. spring 2015). But as soon as the CC reaches its maximum value, temperatures are warm enough to avoid cold stress and since the crop is fully irrigated, the water stress is limited, explaining this plateau. As discussed above, Noah-MP estimates more vegetation over a longer growing season.

In terms of SSM estimates, AquaCrop generally shows a lower SSM compared to Noah-MP, especially in summer (during the irrigation period), due to the absence of the modeling of capillary upward water flow. Noah-MP SSM remains high in summer due to regular large irrigation applications, as also shown by Modanesi et al. (2021). It is important to note that the soil parameters and soil water modeling assumptions are different (Table 1). AquaCrop SSM rapidly reaches its boundaries ( $\theta_{WP}=0.10$  and  $\theta_{FC}=0.22 \text{ m}^3 \text{ m}^{-3}$  for this site) while the 15-day SSM from Noah-MP keeps a smoother intermediate value, far from  $\theta_{WP}$  ( $0.05 \text{ m}^3 \text{ m}^{-3}$ ) and  $\theta_{FC}$  ( $0.31 \text{ m}^3 \text{ m}^{-3}$ ).

The differences in SHPs ( $\theta_{WP}$  and  $\theta_{FC}$ ) represent one of the main factors causing the difference in irrigation application (irrigation amount per event, or per day). The TAW of a 1-m soil layer for Noah-MP is significantly larger than for AquaCrop (260 versus 120 mm) meaning that more water is required to bring the root zone back to  $\theta_{FC}$ . For AquaCrop, once the maximum rootzone depth is reached (1 m) the irrigation application corresponds to 66 mm (with slight variations, as AquaCrop considers the losses through potential ET, and the gains in rainfall of that day). For Noah-MP, the MA is computed at 06:00 AM and if the threshold is reached, the exact amount of water required to bring the soil back to field capacity is computed, not

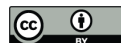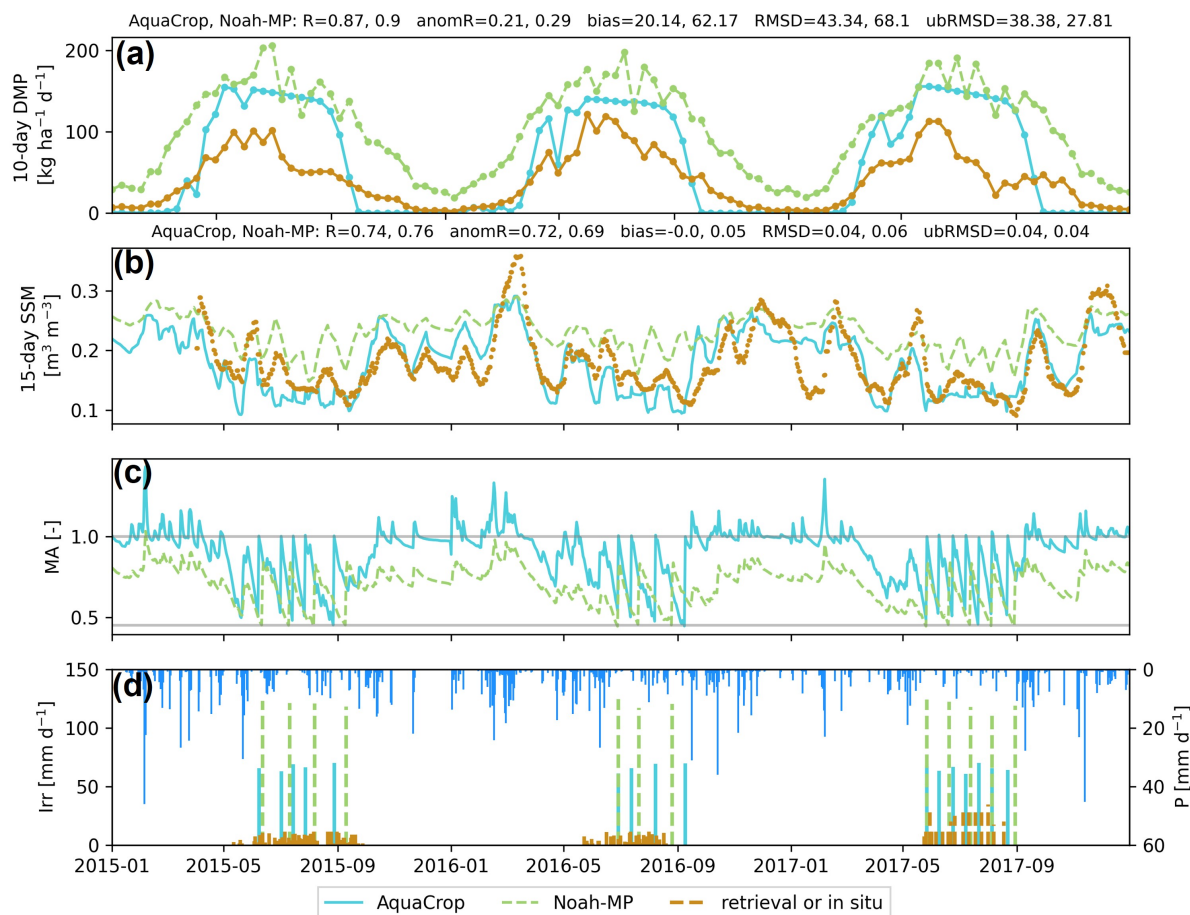

**Figure 8.** Times series of different variables for AquaCrop (full blue lines), Noah-MP (dashed green lines), and reference data (full ochre lines and points) at the Budrio site. (a) 10-day DMP [kg ha<sup>-1</sup> d<sup>-1</sup>] of both models and CGLS DMP. (b) 15-day SSM [m<sup>3</sup> m<sup>-3</sup>] from both models and SMAP. (c) moisture availability (MA [-]). (d) irrigation from both models and field data [mm d<sup>-1</sup>] (left y-axis) and precipitation [mm d<sup>-1</sup>] from MERRA2 (right reverted y-axis). For a and b, the metrics of both model estimates against the reference are shown in the title.

considering any losses (potential ET or runoff) or gains (rainfall). Figure 8c shows the MA, but note that the daily averaged  
475 MA is presented for Noah-MP (and not at 6:00 AM, time when the MA is evaluated in the model).

The benchmark irrigation data are shown along with the irrigation estimates in Figure 8d. First, the in situ irrigation (ochre  
lines) starts earlier than predicted by the models. In reality, the start is dependent on the meteorological forcings (included in  
the modeling) but also on the crop type, and irrigation practice. For instance, water may be required during early development  
stages for certain crops, or farmers may apply pre-sowing irrigation, which are both factors not considered by the models in  
480 this study. Second, the in situ amounts are lower and more distributed since an average of five fields was considered (except



for the last year 2017 when in situ irrigation data are only available for one field). Therefore, large model peaks are difficult to compare with these distributed amounts and temporally aggregated amounts may be more relevant.

Lastly, the total modeled annual irrigation stands out in 2017 (dry year), whereas the in situ data does not show an increase in irrigation for that year (both 2015 and 2017 show an annual irrigation of  $\sim 350$  mm). The satellite retrievals show a lower SSM and a lower DMP in the summer 2017 for the pixel, effectively suggesting a dry year that was perhaps not compensated in the field by irrigation due to water limitations. The same effect can be observed in Figure 4 in which the irrigation retrievals from Dari et al. (2023) do not show a significant increase for 2017.

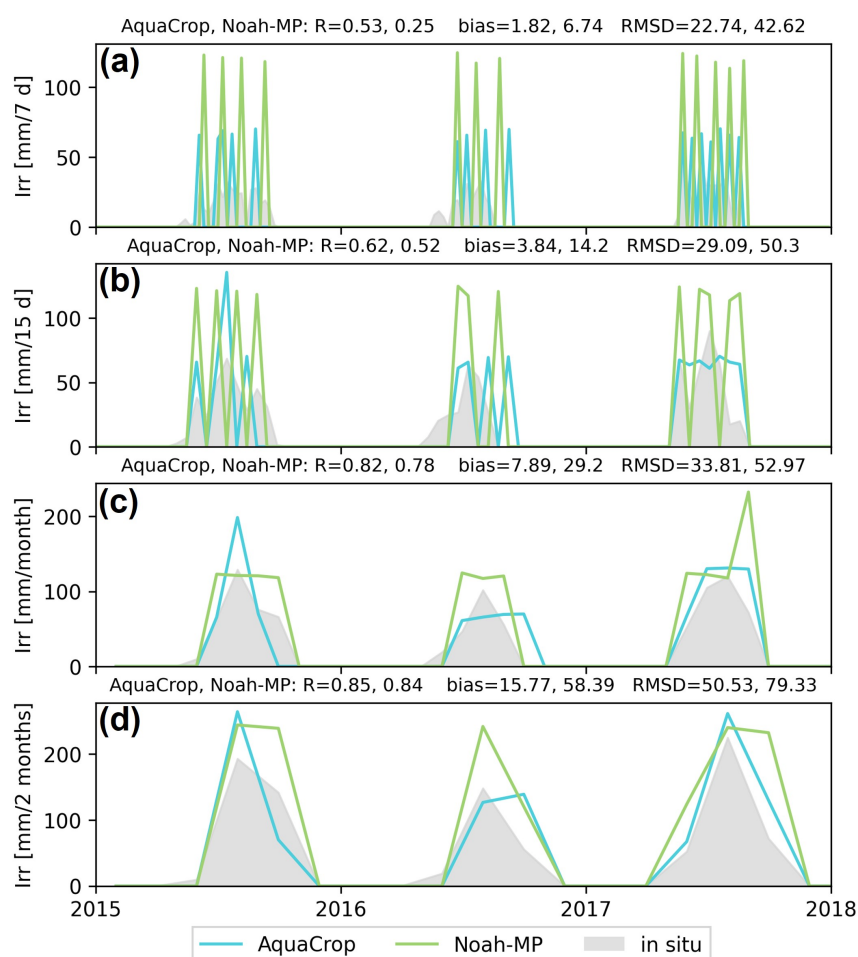

**Figure 9.** Irrigation time series for the Budrio site aggregated over different time intervals. The metrics are computed for the months March through September.

Figure 9 shows the in situ and estimated irrigation for different temporal aggregation levels (weekly, two-weekly, monthly, and two-monthly). The correlation metrics relative to in situ data increase steadily with longer aggregation windows, unlike





490 what was found relative to satellite-based reference data (Figure 5). In line with the evaluation against satellite data (but in contrast to basin-wide irrigation estimates by water managers), both models tend to overestimate the irrigation against in situ data at this field, with the most positive bias for Noah-MP. On shorter aggregation intervals (7 and 15 days), AquaCrop agrees better with the in situ irrigation amounts since the irrigation application depths are much smaller and therefore more distributed. For longer aggregation intervals (one and two months), Noah-MP also shows a good performance by capturing the irrigation  
495 amounts but presents less interannual variability than AquaCrop. Less irrigation was applied in 2016, which is also simulated by AquaCrop but not clearly by Noah-MP.

The results over the Faenza sites in Appendix G confirm that simulated irrigation from both models correlate best with in situ data for longer aggregation intervals. The correlation is higher for AquaCrop for seasonal irrigation estimates, and the limited interannual variation is better captured by AquaCrop. However, both models show a strong irrigation overestimation,  
500 with sometimes more than double the amount observed. Overestimations were also found in other studies (Dari et al., 2023; Modanesi et al., 2022) and are likely due to the dominance of fruit trees (mainly kiwi) for these sites, typically supplied through localized methods (drip irrigation), which are more efficient than sprinkler irrigation.

## 4 Overview, limitations, and future perspectives

### 4.1 Overview of the modeling results

505 The results have shown that both a crop model, AquaCrop, and an LSM, Noah-MP can approximate the average large-scale irrigation rates, after identifying and accounting for the losses. By design, AquaCrop simulates net irrigation amounts and Noah-MP estimates irrigation amounts with minimal application losses, and both do not account for larger transportation and application losses that are included in water records. It is important to note that AquaCrop is computationally less expensive, especially because it runs at a daily time step (and not 15 min as chosen for Noah-MP, required to avoid instabilities in  
510 flux computations). Unsurprisingly, both models estimate very different amounts and timing of irrigation, and the temporal dynamics converge with temporal aggregation. With temporal aggregation, the modeled dynamics better match the in situ data at sparse sites, but not the satellite reference data. The evaluation of other land surface estimates (SSM, DMP, ET) showed a mixed performance for both models. While Noah-MP showed lower errors (ubRMSDs) for all three evaluated variables, AquaCrop sometimes showed a better performance in terms of (anom)R. However, the inconsistency between the limited  
515 available irrigation reference data (water managers, satellite proxies, field data) makes it difficult to perform a conclusive model evaluation. The current limitations in reference in situ and satellite-based datasets is discussed below in Section 4.3 and 4.4.

### 4.2 Model limitations and potential improvements

Noah-MP was originally not designed to accurately model irrigation or even crop growth at the field scale, even though  
520 recent developments are addressing these topics (Liu et al., 2016a). The key soil parameters  $\theta_{WP}$  and  $\theta_{FC}$  were defined to



obtain accurate fluxes (ET), in a mosaic of different land covers. To better represent irrigation within a coarse-scale (non-field) pixel, the use of ensembles could be considered (Modanesi et al., 2022; Nie et al., 2022). For the field-based application, the Noah-MP TAW of the different soil textural classes (Figure 1b and c) is not in line with agricultural applications, leading to unrealistic irrigation events ( $> 100$  mm per application, Figure 8). Additional simulations were performed (not shown) using the more realistic soil parameters for field-based applications as used in AquaCrop, but the results of the Noah-MP and AquaCrop models then diverged even further, with a drastic increase in ET for Noah-MP. This further underscores that each model is developed with its own set of parameters, highlighting that soil moisture is a model-dependent quantity (Koster et al., 2009), and that each model has its own coupling mechanisms between soil moisture and fluxes of ET, runoff (Crow et al., 2023) and irrigation. However, in this study, the exact values of each SHP is of secondary importance, as the difference in process representation between the models is the primary explanation for the difference in irrigation estimation. The Noah-MP vegetation estimates were largely biased compared to the CGLS DMP data, in line with Li et al. (2022) who showed that the most optimal combination of options for vegetation modeling varied greatly depending on the location. Finally, the quality of the DMP reference data over irrigated land is uncertain (see below).

AquaCrop was designed as a management tool and includes various irrigation options, and it was only recently applied in large-scale applications. The model shows potential for regional irrigation modeling, but also strong weaknesses, especially related to the vegetation simulation (DMP evaluation; Figures 6 and 8) and ET modeling (Figure 6). These shortcomings show again that the original purpose of the model was not to provide accurate year-round estimates, but to focus on the agricultural application. More specific crop information will be required in future research but temporally dynamic crop maps are still hard to produce with a high resolution and accuracy (Van Tricht et al., 2023). A valuable development would be to use a crop calibrated in growing degree days, and not in calendar days. The generic crop, designed in calendar days, reaches the same stages on the same day throughout the study domain, while in reality, these stages depend on the meteorological conditions (mainly temperature). A switch to the use of a crop calibrated with growing degree days would make the stages location-dependent. Nevertheless, the length of the growing season shown in Figure 2a already showed the potential of AquaCrop to delay the start of the growing season in the colder regions.

In both models and, more in general within one-dimensional modeling frameworks, the water lost through runoff, as detailed in the regional water balance analysis (Section 3.1.4), is removed from the pixel, resulting in a loss from the system, even though runoff plays an important role in local and regional water management. Nevertheless, since irrigation primarily occurs during the summer period, surface runoff has a milder impact on the results. Another limitation of both models is the homogenization of the SHPs (i) in space (look-up table of SHPs according to texture class) and (ii) vertically (uniform soil texture profile). Both limit the accuracy of the TAW content, a critical parameter in irrigation modeling. An optimal configuration would include an improved parametrization of the SHPs in space (Romano et al., 2011), along with both topsoil and subsoil layers for a heterogeneous soil profile, but these advancements are not yet included in NASA's LIS. Nevertheless, the LIS allows both models to be readily run over other regions, as long as users possess regional knowledge of key parameters, such as the irrigation threshold.



555 Irrigation simulations could be constrained by incorporating the technical improvements described above, or by considering  
other aspects in the modeling, such as the attribution of a water source (which could make the link with the water availability)  
or a better parameterization of the irrigation model (additional irrigation methods and thresholds). However, including more  
information would also entail additional uncertainties, and even with optimally parameterized models, the timing of irrigation  
events and the true amounts, are impossible to capture accurately. Irrigation remains a human decision, influenced by many  
560 factors (water availability, local irrigation practices) that cannot be modeled. Therefore, there is a real need to support models  
with actual observations (e.g. soil moisture, vegetation), either as input in the model (imposing irrigation events to the model)  
or through satellite data assimilation (Abolafia-Rosenzweig et al., 2019; Busschaert et al., 2024; Igder et al., 2022; Maina et al.,  
2024; Modanesi et al., 2022; Nie et al., 2022).

### 4.3 Uncertainty and scarcity of in situ irrigation data

565 Even if models would be perfectly capable of accurately simulating irrigation (and other land surface dynamics), the validation  
of these estimates remains challenging due to the lack of field data and reliable spatial remote sensing data. Field-scale irrigation  
records are typically collected through surveys and agreements with farmers. Therefore, the field-level in situ irrigation data are  
scarce (Foster et al., 2020) and sometimes unreliable (where a farmer reports the wrong irrigation date or amount). In regions  
with more intense and larger irrigation networks (e.g. the Ebro basin in Spain), pumping data or larger monitoring systems  
570 can serve as a benchmark, but this only allows to validate coarse-scale (temporal and spatial) irrigation estimates, e.g. monthly  
estimates at the district scale, as performed in Dari et al. (2023).

### 4.4 Uncertainty in satellite-based retrievals over irrigated areas

The majority of products derived from remote sensing show stronger limitations in the context of irrigated areas than rainfed  
croplands. First, the native spatial resolution of the remote sensing products (relatively coarse compared to fields) complicates  
575 the detection of irrigation signals (in the SSM or vegetation; Ozdogan et al., 2010). Second, the temporal dynamics of irrigation  
practices complicates the calibration of the retrieval algorithms over those areas. Lastly, there are only a few dedicated retrieval  
validation sites in irrigated areas, making the retrievals over those areas unreliable (Fang et al., 2019). More work is needed on  
the development of satellite retrievals over irrigated areas, and especially their validation. Currently, remote sensing-derived  
products, used to assess models in irrigated regions, should not be regarded as an absolute form of validation, but rather as  
580 indicative evaluation.

## 5 Conclusions

Crop models and land surface models are used in different scientific communities, but they can both serve to estimate irrigation,  
soil moisture and vegetation. To evaluate the gap between those two types of models, a crop model, AquaCrop, and an LSM,  
Noah-MP, run within NASA's LIS are compared to estimate irrigation over the Po Valley in Italy. Sprinkler irrigation was  
585 applied following a similar model configuration (irrigation threshold, growing season) for both models. The irrigation estimates



were evaluated at the basin scale and at the pixel level using satellite-based retrievals and field data, respectively. Additionally, the SSM, DMP, and ET were evaluated against satellite retrievals.

At the basin scale, annual irrigation estimates from both models followed similar temporal patterns, driven by the meteorological forcings. However, the average annual irrigation rates diverged, with larger amounts simulated by Noah-MP (434 mm yr<sup>-1</sup>) than by AquaCrop (268 mm yr<sup>-1</sup>), which can be explained by differences in irrigation losses due to evaporation and runoff. Nevertheless, when considering representative losses for both models, the irrigation estimates are in agreement with the management data (500-600 mm yr<sup>-1</sup> of annual irrigation water use on average). The models showed more interannual variability in irrigation amounts than satellite-based data, likely due to irrigation practices and water management that are not included in the model. However, the in situ irrigation estimates were found to show more interannual variability than satellite-based retrievals, suggesting that the retrievals might suffer from inaccuracies in some locations. For the field-based evaluation, AquaCrop showed more realistic irrigation events than Noah-MP, when compared to in situ data, likely due to the difference in soil parameters allowing irrigation events to be better distributed.

The two-week averaged SSM estimates from both models correlated reasonably with downscaled SSM retrievals from SMAP. The anomR was also found to be higher for AquaCrop than for Noah-MP, but the error (ubRMSD) was larger for AquaCrop due to higher dynamics of SSM in AquaCrop. Both models show strong overestimations of the vegetation likely due to generic crop parameters in AquaCrop and a possible sub-optimal parametrization in Noah-MP. The anomR of AquaCrop biomass with DMP is significantly improved for the period when vegetation growth is limited by low temperatures (during the early season). Lastly, the ET evaluation showed reasonable performance for Noah-MP but strong underestimations for AquaCrop, esp. during spring, mainly related to late vegetation development.

Both types of models (crop and land surface) were used for a similar objective, which was to estimate irrigation. The evaluation showed that Noah-MP, developed for coarser scales may not well represent field-scale processes, and thus performs poorly in an evaluation against field data. AquaCrop, only recently used for spatial applications, shows weaknesses at the basin scale due to input generalization (generic crop type). Currently, validating models for irrigated regions is challenging due to the limited and uncertain evaluation data available (in situ and derived from remote sensing). Future improvements in both models are anticipated; however, incorporating observations (e.g., soil moisture, vegetation) is essential to accurately represent irrigation, as this process cannot be effectively captured by any LSM or crop model that does not explicitly model human decision-making processes.

*Code and data availability.* The NASA LIS software is available at <https://github.com/NASA-LIS/LISF> (last access: 25 November 2022). The specific LIS/Noah-MP parameters are available at <https://lis.gsfc.nasa.gov/> (last access: 16 July 2020). The AquaCrop source code can be found on the FAO AquaCrop website (<https://www.fao.org/aquacrop/en/>, last access: 20 April 2023). The source code of AquaCrop coupled to NASA LIS can be found on GitHub ([https://github.com/KUL-RSDA/LISF/tree/ac.7.0\\_integration](https://github.com/KUL-RSDA/LISF/tree/ac.7.0_integration), last access: 20 April 2023) and the generic crop file used for the AquaCrop simulations can be found in the following directory: <https://doi.org/10.1002/2014MS000330> (last access: 20 April 2023).



The input data for this study is freely available and can be retrieved from the following links: MERRA2 (<https://disc.gsfc.nasa.gov/datasets?project=MERRA-2>, last access: 11 March 2023); the CGLS land cover map (<https://land.copernicus.eu/en/products/global-dynamic-land-cover>, last access: 18 January 2023); the soil mineral classification and organic matter from HWSOv1.2 (<http://www.fao.org/soils-portal/data-hub/soil-maps-and-databases/harmonized-world-soil-database-v12/en/>, last access: 16 July 2020).

Other data used in this study are also available free via the following websites: the CGLS DMP product (<https://land.copernicus.eu/en/products/vegetation/dry-matter-productivity-v1-0-300m>, last access: 28 September 2023); the SMAP 1-km downscaled product (v1) distributed by the NASA National Snow and Ice Data Center Distributed Active Archive Center (NSIDC DAAC) (<https://land.copernicus.eu/en/products/vegetation/dry-matter-productivity-v1-0-300m>, last access: 10 August 2023); the SenET data (<https://edp-portal.eurac.edu/discovery/7abdbd94-ddfe-48df-ab09-341ad2f52e47>, 1 September 2024); the CORINE Land Cover map 2018 (<https://land.copernicus.eu/en/products/corine-land-cover/clc2018>, 15 December 2023). The in situ irrigation data are available upon request to the original providers, Canale Emiliano Romagnolo (CER; <https://consorziocer.it/it/>).

The output of the simulations will be made publicly available on Zenodo after acceptance of this paper and can be requested to the author during the review process.

## Appendix A: ET calculation

### A1 AquaCrop

The computation of the evapotranspiration (ET) is performed at a daily tile step, and is separated into two independent calculations for the soil evaporation ( $E$  [ $\text{mm d}^{-1}$ ]) and the crop transpiration ( $Tr$  [ $\text{mm d}^{-1}$ ]). Soil evaporation is driven by the reference evapotranspiration  $ET_0$  [ $\text{mm d}^{-1}$ ] but limited by both soil water availability and canopy shading, and modeled using an evaporation coefficient  $K_e$  [-], which decreases as the soil surface dries and canopy cover increases.

$$E = K_e * ET_0 \quad (\text{A1})$$

$K_e$  is the product of the  $K_{e,max}$  [-], the maximum evaporation coefficient for a fully wet, bare soil), and  $K_r$  [-], a reduction factor that accounts for drying soil and available water in the surface layer. Different practices, such as partial irrigation wetting reduces the  $K_e$ .

Transpiration is directly linked to the green canopy cover (CC) and the  $ET_0$ . For a fully covered, unstressed canopy:

$$Tr = K_{c,Tr} * ET_0 \quad (\text{A2})$$

where  $K_{c,Tr}$  [-] is the crop transpiration coefficient, which depends on the development stage of the crop, particularly the CC. The coefficient  $K_{c,Tr}$  reaches a maximum value  $K_{c,Tr,x}$  [-] under full canopy cover and optimal conditions, and decreases when canopy cover is incomplete or as the canopy dies. Crop transpiration is reduced under stress conditions by applying a combined stress coefficient  $K_s$  [-], representing the impact of water stress, aeration stress, temperature stress, and salinity stress. The actual crop transpiration is then:

$$Tr = K_s * K_{c,Tr} * ET_0 \quad (\text{A3})$$



650  $K_s$  ranges from 0 (full stress) to 1 (no stress). Additional details about the calculation procedures can be found in the AquaCrop reference manual (Raes et al., 2023).

## A2 Noah-MP

In Noah-MP, ET is computed as part of both the water balance and the energy balance. ET is the sum of evaporation from soil, transpiration from vegetation, and evaporation/sublimation from canopy-intercepted water or snow. The energy balance  
655 is solved first at each time step to compute the available energy for evapotranspiration. The processes are summarized and simplified below to emphasize the key components of the ET computation.

The surface energy balance for vegetated and bare soil fractions can be summarized as:

$$R_n = H_S + H_L + G \quad (\text{A4})$$

where  $R_n$  [ $\text{W m}^{-2}$ ] is net radiation,  $H_S$  [ $\text{W m}^{-2}$ ] is sensible heat flux,  $H_L$  [ $\text{W m}^{-2}$ ] is latent heat flux (associated with ET),  
660  $G$  [ $\text{W m}^{-2}$ ] is ground heat flux. Solving this equation provides  $H_L$ , the latent heat flux available for evapotranspiration.

The total ET is partitioned into the canopy interception evaporation ( $E_{canop}$  [ $\text{kg m}^{-2} \text{s}^{-1}$ ]), transpiration ( $Tr$  [ $\text{kg m}^{-2} \text{s}^{-1}$ ]), and soil evaporation ( $E_{soil}$  [ $\text{kg m}^{-2} \text{s}^{-1}$ ]). This partitioning depends on the fractional vegetation cover ( $F_{veg}$  [-]), which is dynamically computed from leaf area index (LAI [ $\text{m}^2 \text{m}^{-2}$ ]).

Transpiration is computed from the vegetated fraction of the surface using a conductance-based approach derived from the  
665 Penman-Monteith equation. The water flux is proportional to the humidity gradient ( $\Delta q$  [ $\text{kg kg}^{-1}$ ]) divided by the sum of aerodynamic resistance ( $r_a$  [ $\text{s m}^{-1}$ ]) and canopy resistance ( $r_c$  [ $\text{s m}^{-1}$ ]):

$$Tr \propto \frac{\Delta q}{r_a + r_c} \quad (\text{A5})$$

The canopy resistance aggregates the stomatal resistances from sunlit and shaded leaves, weighted by the effective leaf area indices for sunlit and shaded leaves ( $LAI_{sun}$  [ $\text{m}^2 \text{m}^{-2}$ ] and  $LAI_{shade}$  [ $\text{m}^2 \text{m}^{-2}$ ]):

$$670 \quad \frac{1}{r_c} = (1 - f_{wet}) * \left( \frac{LAI_{sun}}{r_{sun}} + \frac{LAI_{shade}}{r_{shade}} \right) \quad (\text{A6})$$

where  $f_{wet}$  [-] is the fraction of wetted canopy (leaves covered by intercepted water), and  $r_{sun}$  [ $\text{s m}^{-1}$ ] and  $r_{shade}$  [ $\text{s m}^{-1}$ ] are the stomatal resistances of sunlit and shaded leaves, which are calculated following Ball et al. (1987). The stomatal resistances are modified by a soil moisture stress factor ( $\beta_{tr}$  [-]), which decreases transpiration as soil moisture decreases. For the default Noah-type option,  $\beta_{tr}$  scales linearly between field capacity and wilting point across all root-penetrated layers  $N_{root}$  (Chen  
675 and Dudhia, 2001). The latter is set to a constant value per land cover class and is equal to 3 for croplands, corresponding to a 1-m soil depth for the extraction of transpiration water.

Soil evaporation is computed for the bare soil fraction and for below the canopy, using the ground latent heat flux and a soil surface resistance ( $r_s$  [ $\text{s m}^{-1}$ ]). Similar to the transpiration,  $E$  is proportional to  $\Delta q$ , and inversely proportional to the resistances:

$$680 \quad E_{soil} \propto \frac{\Delta q}{r_a + r_s} \quad (\text{A7})$$



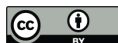

$r_s$  follows the default scheme of Sakaguchi and Zeng (2009), which links resistance to the moisture content of the top soil layer. As the soil dries,  $r_s$  increases, limiting evaporation.

The latent heat flux computed from the energy balance directly constrains the total ET. Once the energy balance provides  $H_L$ , the water balance components (canopy evaporation, transpiration, and soil evaporation) are computed, ensuring the sum of the water fluxes matches the available latent heat. Finally, a water balance check is performed, ensuring the change in total water storage equals the sum of precipitation, evapotranspiration, and runoff components. This guarantees internal consistency between the water and energy cycles. The latent heat fluxes [ $\text{W m}^{-2}$ ] are converted into total water flux (evaporation and transpiration in [ $\text{kg m}^{-2} \text{s}^{-1}$ ], equivalent to [ $\text{mm s}^{-1}$ ]) using the latent heat of vaporization [ $\text{J kg}^{-1}$ ].

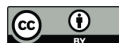

## Appendix B: Noah-MP options

**Table B1.** Selected options for Noah-MPv4.0.1. For further information, the reader can refer to Niu et al. (2011).

| Physical process                             | Selected option                                                  |
|----------------------------------------------|------------------------------------------------------------------|
| Dynamic vegetation                           | Dynamic LAI and $GVF = f(LAI)$                                   |
| Canopy stomatal resistance                   | Ball-Berry (Ball et al., 1987)                                   |
| Soil moisture factor for stomatal resistance | Noah (Chen and Dudhia, 2001)                                     |
| Runoff and groundwater option                | BATS surface and subsurface runoff<br>(Yang and Dickinson, 1996) |
| Surface layer drag coefficient               | Monin-Obukhov similarity theory<br>(Brutsaert, 1982)             |
| Super cooled liquid water                    | Generalized freezing-point depression<br>(Niu and Yang, 2006)    |
| Frozen soil permeability                     | Function of soil moisture<br>(Niu and Yang, 2006)                |
| Radiation transfer option                    | $gap = f(3D; cosz)$ (Niu and Yang, 2004)                         |



## 690 Appendix C: Evaluation with SMAP SSM

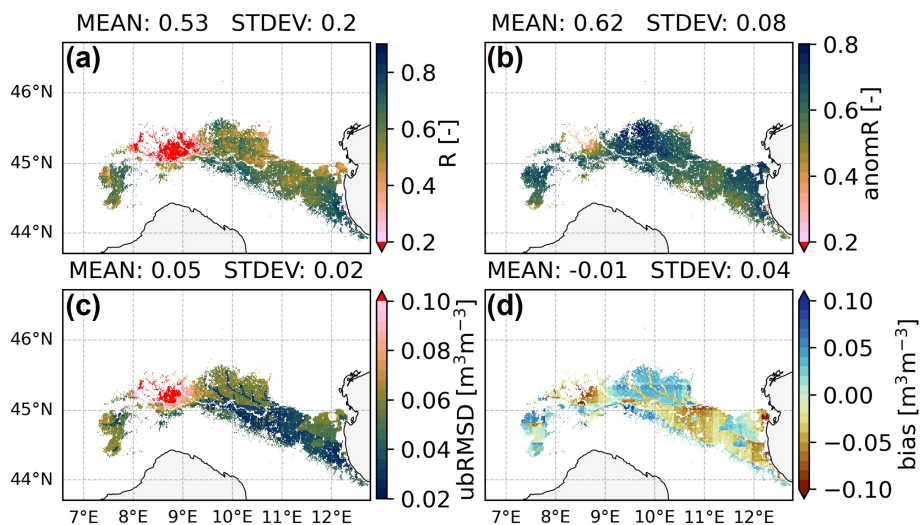

**Figure C1.** Maps of  $R$  [-],  $\text{anomR}$  [-],  $\text{ubRMSD}$  [ $\text{m}^3 \text{m}^{-3}$ ], and  $\text{bias}$  [ $\text{m}^3 \text{m}^{-3}$ ] of the evaluation of AquaCrop 15-day SSM estimates against SMAP 1-km SSM for March through September.

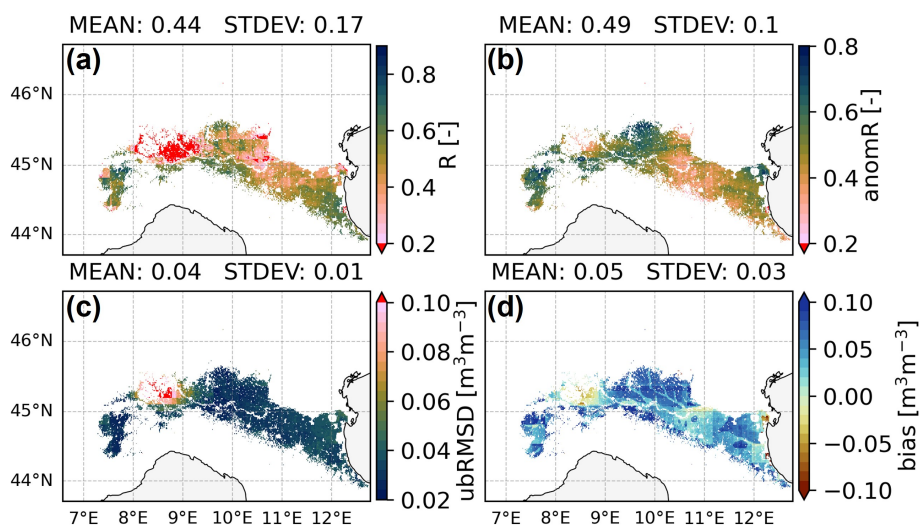

**Figure C2.** Maps of  $R$  [-],  $\text{anomR}$  [-],  $\text{ubRMSD}$  [ $\text{m}^3 \text{m}^{-3}$ ], and  $\text{bias}$  [ $\text{m}^3 \text{m}^{-3}$ ] of the evaluation of Noah-MP 15-day SSM estimates against SMAP 1-km SSM for March through September.

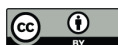

## Appendix D: Evaluation with CGLS DMP

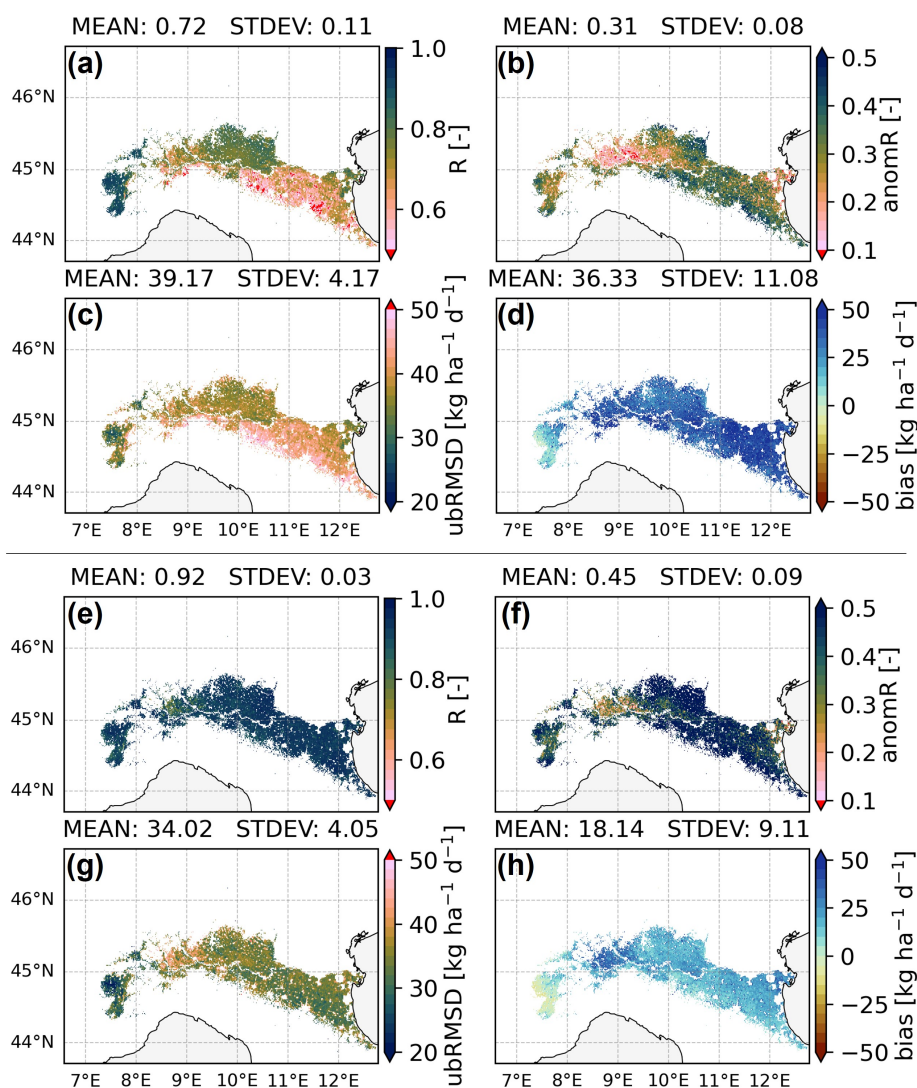

**Figure D1.** Maps of  $R$  [-],  $anomR$  [-],  $ubRMSD$  [ $kg\ ha^{-1}\ d^{-1}$ ], and  $bias$  [ $kg\ ha^{-1}\ d^{-1}$ ] of the evaluation of AquaCrop biomass estimates against 10-day CGLS DMP. The top 4 maps (a to d) correspond to the evaluation over the months March through September, and the bottom panels (e to h) are the evaluation of the months January through June.

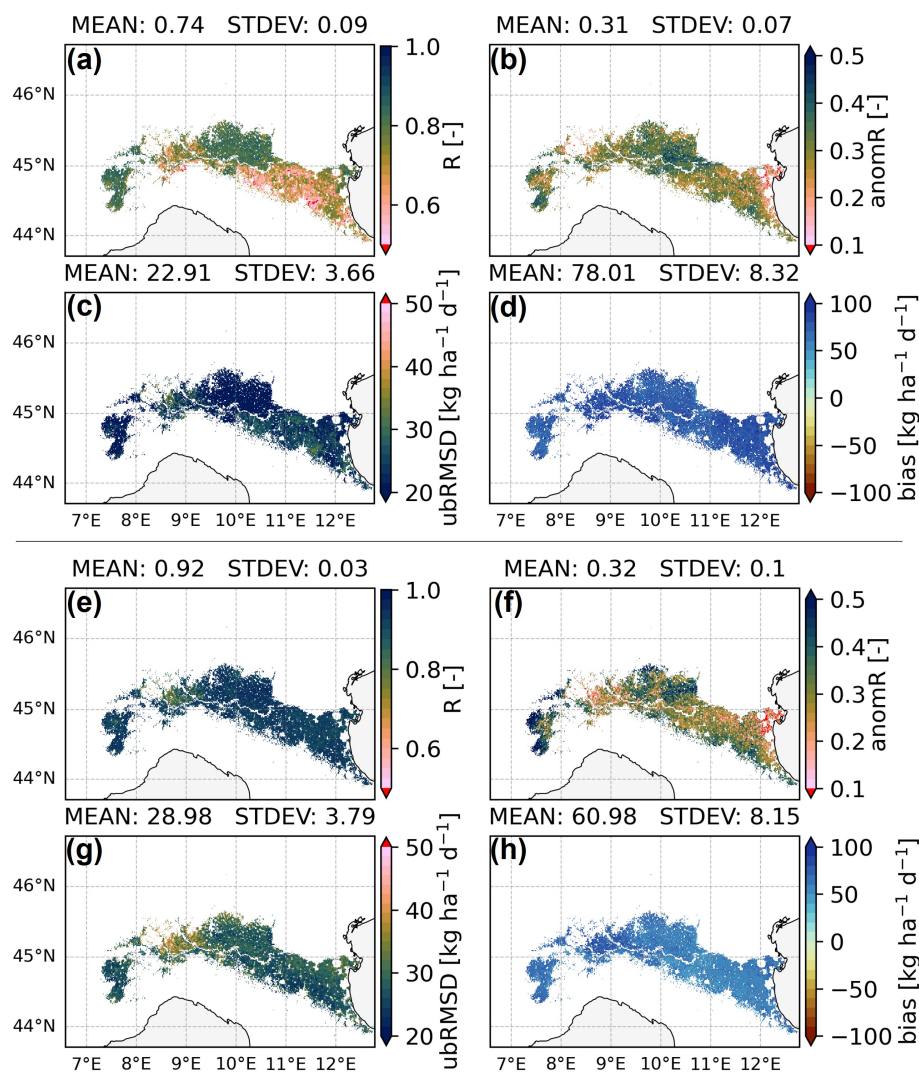

**Figure D2.** Maps of  $R$  [-],  $anomR$  [-],  $ubRMSD$  [ $kg\ ha^{-1}\ d^{-1}$ ], and  $bias$  [ $kg\ ha^{-1}\ d^{-1}$ ] of the evaluation of Noah-MP NPP estimates against 10-day CGLS DMP. The top 4 maps (a to d) correspond to the evaluation over the months March through September, and the bottom panels (e to h) are the evaluation of the months January through June.

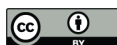

## Appendix E: Evaluation with SenET

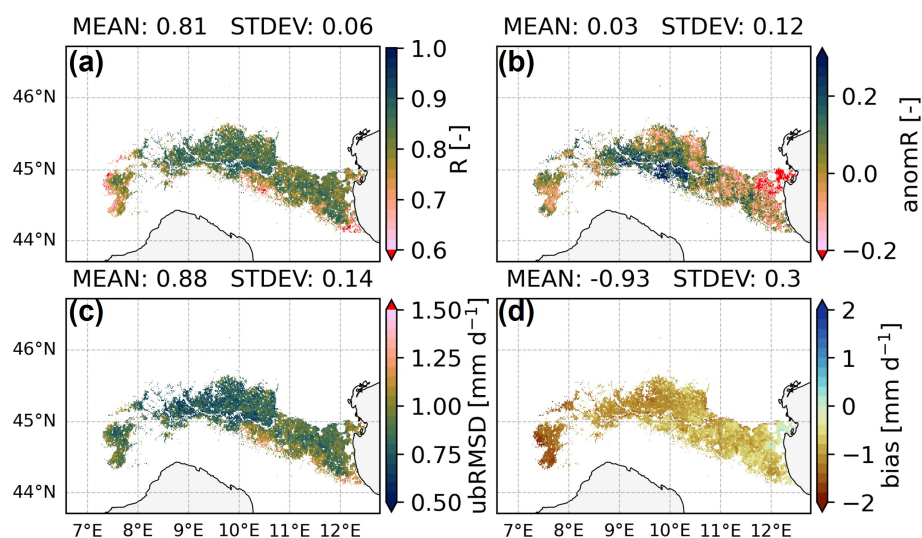

**Figure E1.** Maps of  $R [-]$ ,  $anomR [-]$ ,  $ubRMSD [mm d^{-1}]$ , and  $bias [mm d^{-1}]$  of the evaluation of AquaCrop 15-day ET estimates against SenET for March through September.

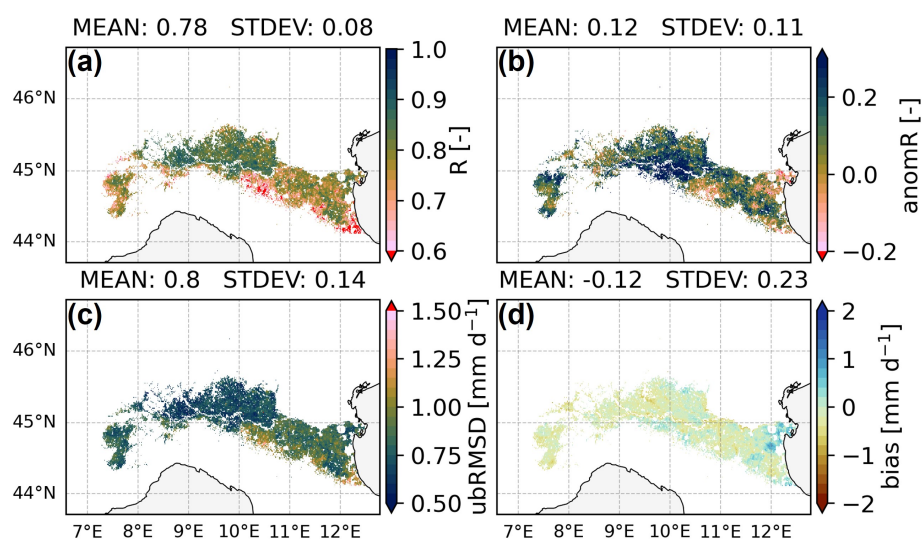

**Figure E2.** Maps of  $R [-]$ ,  $anomR [-]$ ,  $ubRMSD [mm d^{-1}]$ , and  $bias [mm d^{-1}]$  of the evaluation of Noah-MP 15-day ET estimates against SenET for March through September.





## Appendix F: ET time series

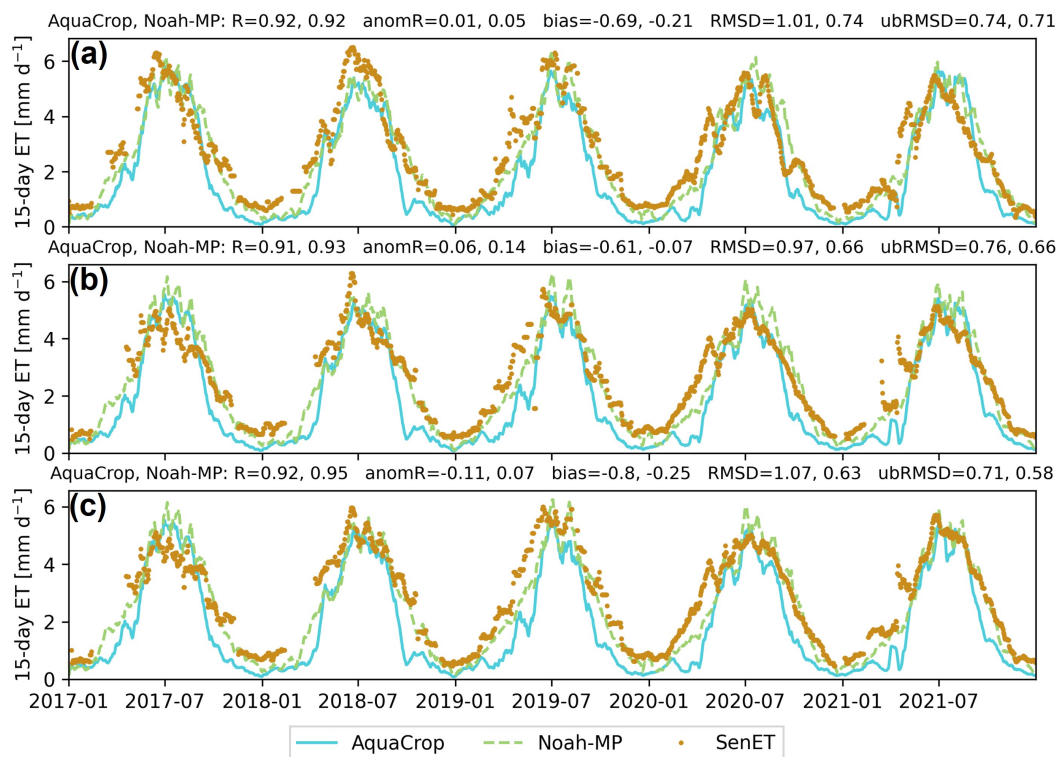

**Figure F1.** Time series of AquaCrop and Noah-MP 15-day ET estimates along with SenET retrievals for (a) Budrio (1 pixel), (b) Faenza San Silvestro (3 pixels), and (c) Faenza Formellino (8 pixels). The metrics are computed over the full year.



## Appendix G: Irrigation evaluation over Faenza fields

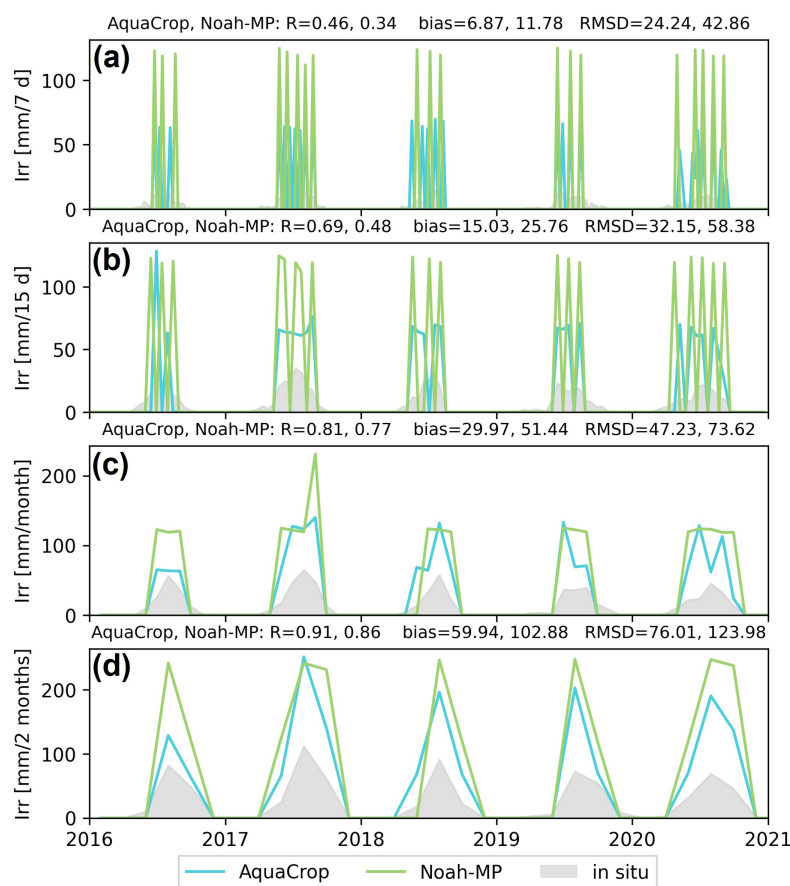

**Figure G1.** Irrigation time series for the Faenza San Silvestro fields aggregated over different time intervals. The metrics are computed for the months March through September. Note that the in situ irrigation amounts between mid-August and December 2018 are missing and the simulated data were masked accordingly.

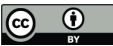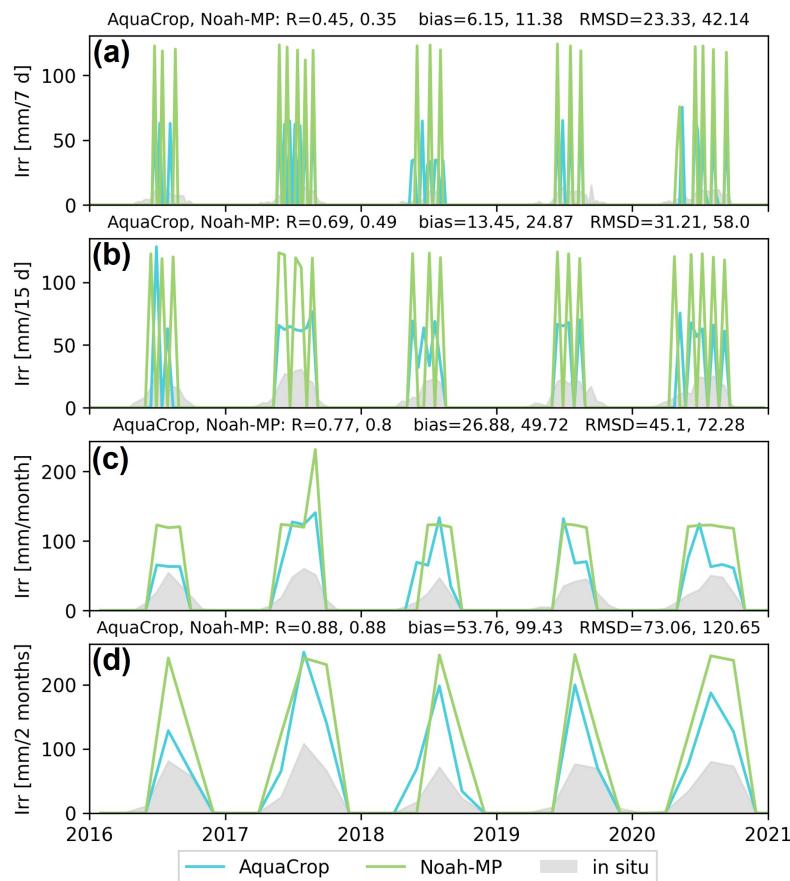

**Figure G2.** Irrigation time series for the Faneza Formellino fields aggregated over different time intervals. The metrics are computed for the months March through September. Note that the in situ irrigation amounts between mid-August and December 2018 are missing and the simulated data were masked accordingly.

695 **Author contributions.** **LB:** Conceptualization, Methodology, Software, Validation, Formal analysis, Investigation, Data Curation, Writing - Original Draft, Visualization. **MB:** Conceptualization, Methodology, Software, Writing - Review & Editing, Supervision. **SM:** Software, Resources, Writing - Review & Editing. **CM:** Resources, Writing - Review & Editing. **DR:** Software, Writing - Review & Editing. **SK:** Software, Writing - Review & Editing. **GDL:** Conceptualization, Methodology, Resources, Writing - Review & Editing, Supervision, Project administration, Funding acquisition.

700 **Competing interests.** The authors declare that they have no known competing financial interests or personal relationships that could have appeared to influence the work reported in this paper.



705 *Acknowledgements.* The research was funded by the Research Foundation - Flanders (FWO; grant no. 1158423N) and supported by ESA 4DMED-Hydrology. For irrigation benchmark data, the authors wish to acknowledge the Canale Emiliano Romagnolo (CER; Emiliana Romagna, Italy). We also would like to thank Jacopo Dari for helping with the data collection. The resources and services used in this work were provided by the VSC (Flemish Supercomputer Center), funded by the FWO and the Flemish government. We thank Nunzio Romano and two reviewers for their suggestions to improve the paper.



## References

- Abolafia-Rosenzweig, R., Livneh, B., Small, E., and Kumar, S.: Soil Moisture Data Assimilation to Estimate Irrigation Water Use, *Journal of Advances in Modeling Earth Systems*, 11, 3670–3690, <https://doi.org/10.1029/2019MS001797>, \_eprint: <https://onlinelibrary.wiley.com/doi/pdf/10.1029/2019MS001797>, 2019.
- Allen, R. G., Pereira, L. S., Raes, D., and Smith, M.: *FAO Irrigation and drainage paper No. 56*, Rome: Food and Agriculture Organization of the United Nations, 56, e156, 1998.
- Arboleda-Obando, P. F., Ducharne, A., Yin, Z., and Ciais, P.: Validation of a new global irrigation scheme in the land surface model ORCHIDEE v2.2, *EGUsphere*, pp. 1–34, <https://doi.org/10.5194/egusphere-2023-1323>, publisher: Copernicus GmbH, 2023.
- 715 Avanzi, F., Munerol, F., Milelli, M., Gabellani, S., Massari, C., Giroto, M., Cremonese, E., Galvagno, M., Bruno, G., Morra di Cella, U., Rossi, L., Altamura, M., and Ferraris, L.: Winter snow deficit was a harbinger of summer 2022 socio-hydrologic drought in the Po Basin, Italy, *Communications Earth & Environment*, 5, 1–12, <https://doi.org/10.1038/s43247-024-01222-z>, publisher: Nature Publishing Group, 2024.
- Ball, J. T., Woodrow, I. E., and Berry, J. A.: A Model Predicting Stomatal Conductance and its Contribution to the Control of Photosynthesis under Different Environmental Conditions, in: *Progress in Photosynthesis Research: Volume 4 Proceedings of the VIIth International Congress on Photosynthesis Providence, Rhode Island, USA, August 10–15, 1986*, edited by Biggins, J., pp. 221–224, Springer Netherlands, Dordrecht, [https://doi.org/10.1007/978-94-017-0519-6\\_48](https://doi.org/10.1007/978-94-017-0519-6_48), 1987.
- 720 Baronetti, A., González-Hidalgo, J. C., Vicente-Serrano, S. M., Acquafredda, F., and Fratianni, S.: A weekly spatio-temporal distribution of drought events over the Po Plain (North Italy) in the last five decades, *International Journal of Climatology*, 40, 4463–4476, <https://doi.org/10.1002/joc.6467>, \_eprint: <https://onlinelibrary.wiley.com/doi/pdf/10.1002/joc.6467>, 2020.
- 725 Bartkowiak, P., Ventura, B., Castelli, M., and Jacob, A.: Daily evaporation product - Po basin, <https://doi.org/10.48784/7ABDBD94-DDFE-48DF-AB09-341AD2F52E47>, 2023.
- Bartkowiak, P., Ventura, B., Jacob, A., and Castelli, M.: A Copernicus-based evapotranspiration dataset at 100 m spatial resolution over four Mediterranean basins, *Earth System Science Data*, 16, 4709–4734, <https://doi.org/10.5194/essd-16-4709-2024>, publisher: Copernicus GmbH, 2024.
- 730 Bonaldo, D., Bellafore, D., Ferrarin, C., Ferretti, R., Ricchi, A., Sangelantoni, L., and Vitellotti, M. L.: The summer 2022 drought: a taste of future climate for the Po valley (Italy)?, *Regional Environmental Change*, 23, 1, <https://doi.org/10.1007/s10113-022-02004-z>, 2022.
- Brocca, L., Gaona, J., Bavera, D., Fioravanti, G., Puca, S., Ciabatta, L., Filippucci, P., Mosaffa, H., Esposito, G., Roberto, N., Dari, J., Vreugdenhil, M., and Wagner, W.: Exploring the actual spatial resolution of 1 km satellite soil moisture products, *Science of The Total Environment*, 945, 174087, <https://doi.org/10.1016/j.scitotenv.2024.174087>, 2024.
- 735 Brutsaert, W.: *Evaporation into the Atmosphere: Theory, History and Applications*, Environmental Fluid Mechanics, Springer Netherlands, <https://books.google.be/books?id=U2puvjUtnnC>, 1982.
- Buchhorn, M., Smets, B., Bertels, L., Roo, B. D., Lesiv, M., Tsendbazar, N.-E., Herold, M., and Fritz, S.: Copernicus Global Land Service: Land Cover 100m: collection 3: epoch 2019: Globe, <https://doi.org/10.5281/ZENODO.3939050>, 2020.
- 740 Busschaert, L., de Roos, S., Thiery, W., Raes, D., and De Lannoy, G. J. M.: Net irrigation requirement under different climate scenarios using AquaCrop over Europe, *Hydrology and Earth System Sciences*, 26, 3731–3752, <https://doi.org/10.5194/hess-26-3731-2022>, publisher: Copernicus GmbH, 2022.



- Busschaert, L., Bechtold, M., Modanesi, S., Massari, C., Brocca, L., and De Lannoy, G. J. M.: Irrigation Quantification Through Backscatter Data Assimilation With a Buddy Check Approach, *Journal of Advances in Modeling Earth Systems*, 16, e2023MS003661, <https://doi.org/10.1029/2023MS003661>, 2024.
- Büttner, G.: CORINE Land Cover and Land Cover Change Products, in: *Land Use and Land Cover Mapping in Europe: Practices & Trends*, edited by Manakos, I. and Braun, M., *Remote Sensing and Digital Image Processing*, pp. 55–74, Springer Netherlands, Dordrecht, [https://doi.org/10.1007/978-94-007-7969-3\\_5](https://doi.org/10.1007/978-94-007-7969-3_5), 2014.
- Campbell, B. M., Beare, D. J., Bennett, E. M., Hall-Spencer, J. M., Ingram, J. S. I., Jaramillo, F., Ortiz, R., Ramankutty, N., Sayer, J. A., and Shindell, D.: Agriculture production as a major driver of the Earth system exceeding planetary boundaries, *Ecology and Society*, 22, <https://www.jstor.org/stable/26798991>, publisher: Resilience Alliance Inc., 2017.
- Chen, F. and Dudhia, J.: Coupling an Advanced Land Surface–Hydrology Model with the Penn State–NCAR MM5 Modeling System. Part I: Model Implementation and Sensitivity, *Monthly Weather Review*, 129, 569–585, [https://doi.org/10.1175/1520-0493\(2001\)129<0569:CAALSH>2.0.CO;2](https://doi.org/10.1175/1520-0493(2001)129<0569:CAALSH>2.0.CO;2), publisher: American Meteorological Society Section: Monthly Weather Review, 2001.
- Chintala, S., Harmya, T. S., Kambhammettu, B. V. N. P., Moharana, S., and Duvvuri, S.: Modelling high-resolution Evapotranspiration in fragmented croplands from the constellation of Sentinels, *Remote Sensing Applications: Society and Environment*, 26, 100704, <https://doi.org/10.1016/j.rsase.2022.100704>, 2022.
- Cosby, B. J., Hornberger, G. M., Clapp, R. B., and Ginn, T. R.: A Statistical Exploration of the Relationships of Soil Moisture Characteristics to the Physical Properties of Soils, *Water Resources Research*, 20, 682–690, <https://doi.org/10.1029/WR020i006p00682>, <https://onlinelibrary.wiley.com/doi/pdf/10.1029/WR020i006p00682>, 1984.
- Crow, W. T., Kim, H., and Kumar, S.: Systematic Modeling Errors Undermine the Application of Land Data Assimilation Systems for Hydrological and Weather Forecasting, <https://doi.org/10.1175/JHM-D-23-0069.1>, section: *Journal of Hydrometeorology*, 2023.
- Dari, J., Brocca, L., Modanesi, S., Massari, C., Tarpanelli, A., Barbetta, S., Quast, R., Vreugdenhil, M., Freeman, V., Barella-Ortiz, A., Quintana-Seguí, P., Bretreger, D., and Volden, E.: Regional data sets of high-resolution (1 and 6&thinsp;km) irrigation estimates from space, *Earth System Science Data*, 15, 1555–1575, <https://doi.org/10.5194/essd-15-1555-2023>, publisher: Copernicus GmbH, 2023.
- De Lannoy, G. J. M., Koster, R. D., Reichle, R. H., Mahanama, S. P. P., and Liu, Q.: An updated treatment of soil texture and associated hydraulic properties in a global land modeling system, *Journal of Advances in Modeling Earth Systems*, 6, 957–979, <https://doi.org/10.1002/2014MS000330>, [\\_eprint: https://onlinelibrary.wiley.com/doi/pdf/10.1002/2014MS000330](https://onlinelibrary.wiley.com/doi/pdf/10.1002/2014MS000330), 2014.
- De Lannoy, G. J. M., Bechtold, M., Busschaert, L., Heyvaert, Z., Modanesi, S., Dunmire, D., Lievens, H., Getirana, A., and Massari, C.: Contributions of Irrigation Modeling, Soil Moisture and Snow Data Assimilation to High-Resolution Water Budget Estimates Over the Po Basin: Progress Towards Digital Replicas, *Journal of Advances in Modeling Earth Systems*, 16, e2024MS004433, <https://doi.org/10.1029/2024MS004433>, [\\_eprint: https://onlinelibrary.wiley.com/doi/pdf/10.1029/2024MS004433](https://onlinelibrary.wiley.com/doi/pdf/10.1029/2024MS004433), 2024.
- de Roos, S., De Lannoy, G. J. M., and Raes, D.: Performance analysis of regional AquaCrop (v6.1) biomass and surface soil moisture simulations using satellite and in situ observations, *Geoscientific Model Development*, 14, 7309–7328, <https://doi.org/10.5194/gmd-14-7309-2021>, publisher: Copernicus GmbH, 2021.
- de Roos, S., Bechtold, M., Busschaert, L., Lievens, H., and De Lannoy, G. J. M.: Assimilation of Sentinel-1 Backscatter to Update AquaCrop Estimates of Soil Moisture and Crop Biomass, *Journal of Geophysical Research: Biogeosciences*, 129, e2024JG008231, <https://doi.org/10.1029/2024JG008231>, [\\_eprint: https://onlinelibrary.wiley.com/doi/pdf/10.1029/2024JG008231](https://onlinelibrary.wiley.com/doi/pdf/10.1029/2024JG008231), 2024.





- de Rosnay, P., Polcher, J., Laval, K., and Sabre, M.: Integrated parameterization of irrigation in the land surface model OR-  
780 CHIDEE. Validation over Indian Peninsula, *Geophysical Research Letters*, 30, <https://doi.org/10.1029/2003GL018024>, \_eprint:  
<https://onlinelibrary.wiley.com/doi/pdf/10.1029/2003GL018024>, 2003.
- Droppers, B., Franssen, W. H. P., van Vliet, M. T. H., Nijssen, B., and Ludwig, F.: Simulating human impacts on global water resources using  
VIC-5, *Geoscientific Model Development*, 13, 5029–5052, <https://doi.org/10.5194/gmd-13-5029-2020>, publisher: Copernicus GmbH,  
2020.
- 785 Döll, P. and Siebert, S.: Global modeling of irrigation water requirements, *Water Resources Research*, 38, 8–1–8–10,  
<https://doi.org/10.1029/2001WR000355>, \_eprint: <https://onlinelibrary.wiley.com/doi/pdf/10.1029/2001WR000355>, 2002.
- Eini, M. R., Salmani, H., and Piniewski, M.: Comparison of process-based and statistical approaches for simulation and projections of rainfed  
crop yields, *Agricultural Water Management*, 277, 108 107, <https://doi.org/10.1016/j.agwat.2022.108107>, 2023.
- Elliott, J., Deryng, D., Müller, C., Frieler, K., Konzmann, M., Gerten, D., Glotter, M., Flörke, M., Wada, Y., Best, N., Eisner, S., Fekete, B. M.,  
790 Folberth, C., Foster, I., Gosling, S. N., Haddeland, I., Khabarov, N., Ludwig, F., Masaki, Y., Olin, S., Rosenzweig, C., Ruane, A. C., Satoh,  
Y., Schmid, E., Stacke, T., Tang, Q., and Wisser, D.: Constraints and potentials of future irrigation water availability on agricultural produc-  
tion under climate change, *Proceedings of the National Academy of Sciences*, 111, 3239–3244, <https://doi.org/10.1073/pnas.1222474110>,  
publisher: Proceedings of the National Academy of Sciences, 2014.
- Fang, B., Lakshmi, V., Cosh, M., Liu, P.-W., Bindlish, R., and Jackson, T. J.: A global 1-km downscaled SMAP soil mois-  
795 ture product based on thermal inertia theory, *Vadose Zone Journal*, 21, e20 182, <https://doi.org/10.1002/vzj2.20182>, \_eprint:  
<https://onlinelibrary.wiley.com/doi/pdf/10.1002/vzj2.20182>, 2022.
- Fang, H., Baret, F., Plummer, S., and Schaepman-Strub, G.: An Overview of Global Leaf Area Index (LAI): Methods,  
Products, Validation, and Applications, *Reviews of Geophysics*, 57, 739–799, <https://doi.org/10.1029/2018RG000608>, \_eprint:  
<https://onlinelibrary.wiley.com/doi/pdf/10.1029/2018RG000608>, 2019.
- 800 Fisher, R. A. and Koven, C. D.: Perspectives on the Future of Land Surface Models and the Challenges of Representing Complex Terres-  
trial Systems, *Journal of Advances in Modeling Earth Systems*, 12, e2018MS001 453, <https://doi.org/10.1029/2018MS001453>, \_eprint:  
<https://onlinelibrary.wiley.com/doi/pdf/10.1029/2018MS001453>, 2020.
- Foster, T., Mieno, T., and Brozović, N.: Satellite-Based Monitoring of Irrigation Water Use: Assessing Measurement Er-  
rors and Their Implications for Agricultural Water Management Policy, *Water Resources Research*, 56, e2020WR028 378,  
805 <https://doi.org/10.1029/2020WR028378>, \_eprint: <https://onlinelibrary.wiley.com/doi/pdf/10.1029/2020WR028378>, 2020.
- Gelaro, R., McCarty, W., Suárez, M. J., Todling, R., Molod, A., Takacs, L., Randles, C. A., Darmenov, A., Bosilovich, M. G., Reichle,  
R., Wargan, K., Coy, L., Cullather, R., Draper, C., Akella, S., Buchard, V., Conaty, A., Silva, A. M. d., Gu, W., Kim, G.-K., Koster, R.,  
Lucchesi, R., Merkova, D., Nielsen, J. E., Partyka, G., Pawson, S., Putman, W., Rienecker, M., Schubert, S. D., Sienkiewicz, M., and Zhao,  
B.: The Modern-Era Retrospective Analysis for Research and Applications, Version 2 (MERRA-2), *Journal of Climate*, 30, 5419–5454,  
810 <https://doi.org/10.1175/JCLI-D-16-0758.1>, publisher: American Meteorological Society Section: Journal of Climate, 2017.
- Guerra, L. C., Garcia y Garcia, A., Hook, J. E., Harrison, K. A., Thomas, D. L., Stooksbury, D. E., and Hoogenboom, G.:  
Irrigation water use estimates based on crop simulation models and kriging, *Agricultural Water Management*, 89, 199–207,  
<https://doi.org/10.1016/j.agwat.2007.01.010>, 2007.
- Igder, O. M., Alizadeh, H., Mojaradi, B., and Bayat, M.: Multivariate assimilation of satellite-based leaf area index and ground-  
815 based river streamflow for hydrological modelling of irrigated watersheds using SWAT+, *Journal of Hydrology*, 610, 128012,  
<https://doi.org/10.1016/j.jhydrol.2022.128012>, 2022.



- Ingwersen, J., Högy, P., Witzmann, H. D., Warrach-Sagi, K., and Streck, T.: Coupling the land surface model Noah-MP with the generic crop growth model Gecros: Model description, calibration and validation, *Agricultural and Forest Meteorology*, 262, 322–339, <https://doi.org/10.1016/j.agrformet.2018.06.023>, 2018.
- 820 Irmak, S., Odhiambo, L., Kranz, W. L., and Eisenhauer, D.: Irrigation Efficiency and Uniformity, and Crop Water Use Efficiency, *Biological Systems Engineering: Papers and Publications*, <https://digitalcommons.unl.edu/biosysengfacpub/451>, 2011.
- Jones, J. W., Antle, J. M., Basso, B., Boote, K. J., Conant, R. T., Foster, I., Godfray, H. C. J., Herrero, M., Howitt, R. E., Janssen, S., Keating, B. A., Munoz-Carpena, R., Porter, C. H., Rosenzweig, C., and Wheeler, T. R.: Brief history of agricultural systems modeling, *Agricultural Systems*, 155, 240–254, <https://doi.org/10.1016/j.agry.2016.05.014>, 2017.
- 825 Kishné, A. S., Yimam, Y. T., Morgan, C. L. S., and Dornblaser, B. C.: Evaluation and improvement of the default soil hydraulic parameters for the Noah Land Surface Model, *Geoderma*, 285, 247–259, <https://doi.org/10.1016/j.geoderma.2016.09.022>, 2017.
- Knox, J. W., Kay, M. G., and Weatherhead, E. K.: Water regulation, crop production, and agricultural water management—Understanding farmer perspectives on irrigation efficiency, *Agricultural Water Management*, 108, 3–8, <https://doi.org/10.1016/j.agwat.2011.06.007>, 2012.
- Koster, R. D., Guo, Z., Yang, R., Dirmeyer, P. A., Mitchell, K., and Puma, M. J.: On the Nature of Soil Moisture in Land Surface Models, *Journal of Climate*, 22, 4322–4335, <https://doi.org/10.1175/2009JCLI2832.1>, publisher: American Meteorological Society Section: *Journal of Climate*, 2009.
- Krinner, G., Viovy, N., de Noblet-Ducoudré, N., Ogée, J., Polcher, J., Friedlingstein, P., Ciais, P., Sitch, S., and Prentice, I. C.: A dynamic global vegetation model for studies of the coupled atmosphere-biosphere system, *Global Biogeochemical Cycles*, 19, <https://doi.org/10.1029/2003GB002199>, eprint: <https://onlinelibrary.wiley.com/doi/pdf/10.1029/2003GB002199>, 2005.
- 835 Kumar, S. V., Peters-Lidard, C. D., Tian, Y., Houser, P. R., Geiger, J., Olden, S., Lighty, L., Eastman, J. L., Doty, B., Dirmeyer, P., Adams, J., Mitchell, K., Wood, E. F., and Sheffield, J.: Land information system: An interoperable framework for high resolution land surface modeling, *Environmental Modelling & Software*, 21, 1402–1415, <https://doi.org/10.1016/j.envsoft.2005.07.004>, 2006.
- Kumar, S. V., Reichle, R. H., Peters-Lidard, C. D., Koster, R. D., Zhan, X., Crow, W. T., Eylander, J. B., and Houser, P. R.: A land surface data assimilation framework using the land information system: Description and applications, *Advances in Water Resources*, 31, 1419–1432, <https://doi.org/10.1016/j.advwatres.2008.01.013>, 2008.
- 840 Lawrence, D. M., Fisher, R. A., Koven, C. D., Oleson, K. W., Swenson, S. C., Bonan, G., Collier, N., Ghimire, B., van Kampenhout, L., Kennedy, D., Kluzek, E., Lawrence, P. J., Li, F., Li, H., Lombardozzi, D., Riley, W. J., Sacks, W. J., Shi, M., Vertenstein, M., Wieder, W. R., Xu, C., Ali, A. A., Badger, A. M., Bisht, G., van den Broeke, M., Brunke, M. A., Burns, S. P., Buzan, J., Clark, M., Craig, A., Dahlin, K., Drewniak, B., Fisher, J. B., Flanner, M., Fox, A. M., Gentile, P., Hoffman, F., Keppel-Aleks, G., Knox, R., Kumar, S., Lenaerts, J., Leung, L. R., Lipscomb, W. H., Lu, Y., Pandey, A., Pelletier, J. D., Perket, J., Randerson, J. T., Ricciuto, D. M., Sanderson, B. M., Slater, A., Subin, Z. M., Tang, J., Thomas, R. Q., Val Martin, M., and Zeng, X.: The Community Land Model Version 5: Description of New Features, Benchmarking, and Impact of Forcing Uncertainty, *Journal of Advances in Modeling Earth Systems*, 11, 4245–4287, <https://doi.org/10.1029/2018MS001583>, eprint: <https://onlinelibrary.wiley.com/doi/pdf/10.1029/2018MS001583>, 2019.
- Lawston, P. M., Santanello, J. A., Zaitchik, B. F., and Rodell, M.: Impact of Irrigation Methods on Land Surface Model Spinup and Initial-  
850 ization of WRF Forecasts, *Journal of Hydrometeorology*, 16, 1135–1154, <https://doi.org/10.1175/JHM-D-14-0203.1>, publisher: American Meteorological Society Section: *Journal of Hydrometeorology*, 2015.
- Lawston, P. M., Santanello Jr., J. A., Franz, T. E., and Rodell, M.: Assessment of irrigation physics in a land surface modeling framework using non-traditional and human-practice datasets, *Hydrology and Earth System Sciences*, 21, 2953–2966, <https://doi.org/10.5194/hess-21-2953-2017>, publisher: Copernicus GmbH, 2017.



- 855 Lawston-Parker, P., Santanello Jr., J. A., and Chaney, N. W.: Investigating the response of land–atmosphere interactions and feedbacks to spatial representation of irrigation in a coupled modeling framework, *Hydrology and Earth System Sciences*, 27, 2787–2805, <https://doi.org/10.5194/hess-27-2787-2023>, publisher: Copernicus GmbH, 2023.
- Leng, G., Huang, M., Tang, Q., Sacks, W. J., Lei, H., and Leung, L. R.: Modeling the effects of irrigation on land surface fluxes and states over the conterminous United States: Sensitivity to input data and model parameters, *Journal of Geophysical Research: Atmospheres*, 118, 9789–9803, <https://doi.org/10.1002/jgrd.50792>, \_eprint: <https://onlinelibrary.wiley.com/doi/pdf/10.1002/jgrd.50792>, 2013.
- 860 Li, J., Miao, C., Zhang, G., Fang, Y.-H., Shangguan, W., and Niu, G.-Y.: Global Evaluation of the Noah-MP Land Surface Model and Suggestions for Selecting Parameterization Schemes, *Journal of Geophysical Research: Atmospheres*, 127, e2021JD035753, <https://doi.org/10.1029/2021JD035753>, \_eprint: <https://onlinelibrary.wiley.com/doi/pdf/10.1029/2021JD035753>, 2022.
- Liang, X., Lettenmaier, D. P., Wood, E. F., and Burges, S. J.: A simple hydrologically based model of land surface water and energy fluxes for general circulation models, *Journal of Geophysical Research: Atmospheres*, 99, 14 415–14 428, <https://doi.org/10.1029/94JD00483>, 865 \_eprint: <https://onlinelibrary.wiley.com/doi/pdf/10.1029/94JD00483>, 1994.
- Liu, X., Chen, F., Barlage, M., Zhou, G., and Niyogi, D.: Noah-MP-Crop: Introducing dynamic crop growth in the Noah-MP land surface model, *Journal of Geophysical Research: Atmospheres*, 121, 13,953–13,972, <https://doi.org/10.1002/2016JD025597>, \_eprint: <https://onlinelibrary.wiley.com/doi/pdf/10.1002/2016JD025597>, 2016a.
- 870 Liu, Y., Hejazi, M., Kyle, P., Kim, S. H., Davies, E., Miralles, D. G., Teuling, A. J., He, Y., and Niyogi, D.: Global and Regional Evaluation of Energy for Water, *Environmental Science & Technology*, 50, 9736–9745, <https://doi.org/10.1021/acs.est.6b01065>, publisher: American Chemical Society, 2016b.
- Ma, N., Niu, G.-Y., Xia, Y., Cai, X., Zhang, Y., Ma, Y., and Fang, Y.: A Systematic Evaluation of Noah-MP in Simulating Land-Atmosphere Energy, Water, and Carbon Exchanges Over the Continental United States, *Journal of Geophysical Research: Atmospheres*, 122, 12,245–12,268, <https://doi.org/10.1002/2017JD027597>, \_eprint: <https://onlinelibrary.wiley.com/doi/pdf/10.1002/2017JD027597>, 875 2017.
- Maina, F. Z., Getirana, A., Kumar, S. V., Saharia, M., Biswas, N. K., McLarty, S., and Appana, R.: Irrigation-driven groundwater depletion in the Ganges-Brahmaputra basin decreases the streamflow in the Bay of Bengal, *Communications Earth & Environment*, 5, 1–10, <https://doi.org/10.1038/s43247-024-01348-0>, publisher: Nature Publishing Group, 2024.
- Massari, C., Modanesi, S., Dari, J., Gruber, A., De Lannoy, G. J. M., Girotto, M., Quintana-Seguí, P., Le Page, M., Jarlan, L., Zribi, M., 880 Ouaadi, N., Vreugdenhil, M., Zappa, L., Dorigo, W., Wagner, W., Brombacher, J., Pelgrum, H., Jaquot, P., Freeman, V., Volden, E., Fernandez Prieto, D., Tarpanelli, A., Barbetta, S., and Brocca, L.: A Review of Irrigation Information Retrievals from Space and Their Utility for Users, *Remote Sensing*, 13, 4112, <https://doi.org/10.3390/rs13204112>, number: 20 Publisher: Multidisciplinary Digital Publishing Institute, 2021.
- McDermid, S., Nocco, M., Lawston-Parker, P., Keune, J., Pokhrel, Y., Jain, M., Jägermeyr, J., Brocca, L., Massari, C., Jones, A. D., Vahmani, P., Thiery, W., Yao, Y., Bell, A., Chen, L., Dorigo, W., Hanasaki, N., Jasechko, S., Lo, M.-H., Mahmood, R., Mishra, V., Mueller, N. D., 885 Niyogi, D., Rabin, S. S., Sloat, L., Wada, Y., Zappa, L., Chen, F., Cook, B. I., Kim, H., Lombardozzi, D., Polcher, J., Ryu, D., Santanello, J., Satoh, Y., Seneviratne, S., Singh, D., and Yokohata, T.: Irrigation in the Earth system, *Nature Reviews Earth & Environment*, 4, 435–453, <https://doi.org/10.1038/s43017-023-00438-5>, number: 7 Publisher: Nature Publishing Group, 2023.
- Merlin, O., Escorihuela, M. J., Mayoral, M. A., Hagolle, O., Al Bitar, A., and Kerr, Y.: Self-calibrated evaporation-based disaggregation of SMOS soil moisture: An evaluation study at 3 km and 100 m resolution in Catalunya, Spain, *Remote Sensing of Environment*, 130, 25–38, <https://doi.org/10.1016/j.rse.2012.11.008>, 890 2013.



- Mialyk, O., Schyns, J. F., Booij, M. J., Su, H., Hogeboom, R. J., and Berger, M.: Water footprints and crop water use of 175 individual crops for 1990–2019 simulated with a global crop model, *Scientific Data*, 11, 206, <https://doi.org/10.1038/s41597-024-03051-3>, publisher: Nature Publishing Group, 2024.
- 895 Mirschel, W., Schultz, A., Wenkel, K.-O., Wieland, R., and Poluektov, R.: Crop growth modelling on different spatial scales—a wide spectrum of approaches, *Archives of Agronomy and Soil Science*, 50, 329–343, <https://doi.org/10.1080/03650340310001634353>, publisher: Taylor & Francis \_eprint: <https://doi.org/10.1080/03650340310001634353>, 2004.
- Modanesi, S., Massari, C., Gruber, A., Lievens, H., Tarpanelli, A., Morbidelli, R., and De Lannoy, G. J. M.: Optimizing a backscatter forward operator using Sentinel-1 data over irrigated land, *Hydrology and Earth System Sciences*, 25, 6283–6307, [https://doi.org/10.5194/hess-](https://doi.org/10.5194/hess-25-6283-2021)  
900 25-6283-2021, publisher: Copernicus GmbH, 2021.
- Modanesi, S., Massari, C., Bechtold, M., Lievens, H., Tarpanelli, A., Brocca, L., Zappa, L., and De Lannoy, G. J. M.: Challenges and benefits of quantifying irrigation through the assimilation of Sentinel-1 backscatter observations into Noah-MP, *Hydrology and Earth System Sciences*, 26, 4685–4706, <https://doi.org/10.5194/hess-26-4685-2022>, publisher: Copernicus GmbH, 2022.
- Molle, F. and Sanchis-Ibor, C.: Irrigation Policies in the Mediterranean: Trends and Challenges, in: *Irrigation in the Mediterranean: Technologies, Institutions and Policies*, edited by Molle, F., Sanchis-Ibor, C., and Avellà-Reus, L., *Global Issues in Water Policy*, pp. 279–313, Springer International Publishing, Cham, [https://doi.org/10.1007/978-3-030-03698-0\\_10](https://doi.org/10.1007/978-3-030-03698-0_10), 2019.
- 905 Montanari, A., Nguyen, H., Rubinetti, S., Ceola, S., Galelli, S., Rubino, A., and Zanchettin, D.: Why the 2022 Po River drought is the worst in the past two centuries, *Science Advances*, 9, eadg8304, <https://doi.org/10.1126/sciadv.adg8304>, publisher: American Association for the Advancement of Science, 2023.
- 910 Monteith, J. L.: Solar Radiation and Productivity in Tropical Ecosystems, *Journal of Applied Ecology*, 9, 747–766, <https://doi.org/10.2307/2401901>, publisher: [British Ecological Society, Wiley], 1972.
- Nie, W., Kumar, S. V., Peters-Lidard, C. D., Zaitchik, B. F., Arsenault, K. R., Bindlish, R., and Liu, P.-W.: Assimilation of Remotely Sensed Leaf Area Index Enhances the Estimation of Anthropogenic Irrigation Water Use, *Journal of Advances in Modeling Earth Systems*, 14, e2022MS003 040, <https://doi.org/10.1029/2022MS003040>, \_eprint: <https://onlinelibrary.wiley.com/doi/pdf/10.1029/2022MS003040>,  
915 2022.
- Niu, G.-Y. and Yang, Z.-L.: Effects of vegetation canopy processes on snow surface energy and mass balances, *Journal of Geophysical Research: Atmospheres*, 109, <https://doi.org/10.1029/2004JD004884>, \_eprint: <https://onlinelibrary.wiley.com/doi/pdf/10.1029/2004JD004884>, 2004.
- Niu, G.-Y. and Yang, Z.-L.: Effects of Frozen Soil on Snowmelt Runoff and Soil Water Storage at a Continental Scale, *Journal of Hydrometeorology*, 7, 937–952, <https://doi.org/10.1175/JHM538.1>, publisher: American Meteorological Society Section: *Journal of Hydrometeorology*, 2006.
- 920 Niu, G.-Y., Yang, Z.-L., Mitchell, K. E., Chen, F., Ek, M. B., Barlage, M., Kumar, A., Manning, K., Niyogi, D., Rosero, E., Tewari, M., and Xia, Y.: The community Noah land surface model with multiparameterization options (Noah-MP): 1. Model description and evaluation with local-scale measurements, *Journal of Geophysical Research: Atmospheres*, 116, <https://doi.org/10.1029/2010JD015139>, \_eprint: <https://onlinelibrary.wiley.com/doi/pdf/10.1029/2010JD015139>, 2011.
- 925 Ozdogan, M., Yang, Y., Allez, G., and Cervantes, C.: Remote Sensing of Irrigated Agriculture: Opportunities and Challenges, *Remote Sensing*, 2, 2274–2304, <https://doi.org/10.3390/rs2092274>, number: 9 Publisher: Molecular Diversity Preservation International, 2010.
- Pasquel, D., Roux, S., Richetti, J., Cammarano, D., Tisseyre, B., and Taylor, J. A.: A review of methods to evaluate crop model performance at multiple and changing spatial scales, *Precision Agriculture*, 23, 1489–1513, <https://doi.org/10.1007/s11119-022-09885-4>, 2022.



- 930 Penman, J.: Good practice guidance for land use, land-use change and forestry /The Intergovernmental Panel on Climate Change. Ed. by Jim Penman, Hayama, Kanagawa, 2003.
- Pokhrel, Y. N., Hanasaki, N., Wada, Y., and Kim, H.: Recent progresses in incorporating human land–water management into global land surface models toward their integration into Earth system models, *WIREs Water*, 3, 548–574, <https://doi.org/10.1002/wat2.1150>, \_eprint: <https://onlinelibrary.wiley.com/doi/pdf/10.1002/wat2.1150>, 2016.
- 935 Puy, A., Borgonovo, E., Lo Piano, S., Levin, S. A., and Saltelli, A.: Irrigated areas drive irrigation water withdrawals, *Nature Communications*, 12, 4525, <https://doi.org/10.1038/s41467-021-24508-8>, number: 1 Publisher: Nature Publishing Group, 2021.
- Raes, D.: BUDGET - a soil water and salt balance model. reference manual., KU Leuven, Leuven, Belgium, [https://iupware.be/wp-content/uploads/2016/03/budget\\_manual.pdf](https://iupware.be/wp-content/uploads/2016/03/budget_manual.pdf), 2002.
- Raes, D., Steduto, P., Hsiao, T. C., and Fereres, E.: AquaCrop—The FAO Crop Model to Simulate Yield Response to Water: II. Main Algorithms and Software Description, *Agronomy Journal*, 101, 438–447, <https://doi.org/10.2134/agronj2008.0140s>, \_eprint: <https://onlinelibrary.wiley.com/doi/pdf/10.2134/agronj2008.0140s>, 2009.
- 940 Raes, D., Steduto, P., Hsiao, T. C., and Fereres, E.: AquaCrop Reference manual, Version 7.1, FAO, Rome, Italy, <http://www.fao.org/nr/water/aquacrop.html>, 2023.
- Rivieccio, R., Di Bene, C., Paolanti, M., Marchetti, M., and Napoli, R.: Soil rooting depth of Italy, *Journal of Maps*, 16, 36–42, <https://doi.org/10.1080/17445647.2019.1690595>, publisher: Taylor & Francis \_eprint: <https://doi.org/10.1080/17445647.2019.1690595>, 2020.
- 945 Rohwer, J., Gerten, D., and Lucht, W.: Development of functional irrigation types for improved global crop modelling, <https://www.osti.gov/etdeweb/biblio/20930477>, 2007.
- Romano, N., Palladino, M., and Chirico, G. B.: Parameterization of a bucket model for soil-vegetation-atmosphere modeling under seasonal climatic regimes, *Hydrology and Earth System Sciences*, 15, 3877–3893, <https://doi.org/10.5194/hess-15-3877-2011>, publisher: Copernicus GmbH, 2011.
- 950 Romano, N., Mazzitelli, C., and Nasta, P.: Root-Zone Water-Storage Capacity and Uncertainty: An Intrinsic Factor Affecting Agroecosystem Resilience to Drought, *Water Resources Research*, 61, e2024WR037719, <https://doi.org/10.1029/2024WR037719>, \_eprint: <https://onlinelibrary.wiley.com/doi/pdf/10.1029/2024WR037719>, 2025.
- 955 Sakaguchi, K. and Zeng, X.: Effects of soil wetness, plant litter, and under-canopy atmospheric stability on ground evaporation in the Community Land Model (CLM3.5), *Journal of Geophysical Research: Atmospheres*, 114, <https://doi.org/10.1029/2008JD010834>, \_eprint: <https://onlinelibrary.wiley.com/doi/pdf/10.1029/2008JD010834>, 2009.
- Salmon, J. M., Friedl, M. A., Frolking, S., Wisser, D., and Douglas, E. M.: Global rain-fed, irrigated, and paddy croplands: A new high resolution map derived from remote sensing, crop inventories and climate data, *International Journal of Applied Earth Observation and Geoinformation*, 38, 321–334, <https://doi.org/10.1016/j.jag.2015.01.014>, 2015.
- 960 Sharma, S., Gupta, M., and Sahai, A. K.: Assessing implications of irrigation scheme in NASA-Land Information System Framework on land surface fluxes in Punjab, India, *Geocarto International*, 37, 6999–7020, <https://doi.org/10.1080/10106049.2021.1970244>, publisher: Taylor & Francis \_eprint: <https://doi.org/10.1080/10106049.2021.1970244>, 2022.
- Spiliotopoulos, M., Alpanakis, N., Tziatzios, G. A., Faraslis, I., Sidiropoulos, P., Sakellariou, S., Karoutsos, G., Dalezios, N. R., and Dercas, N.: Estimation of Remotely Sensed Actual Evapotranspiration in Water-Limited Mediterranean Agroecosystems for Monitoring Crop (cotton) Water Requirements, *Environmental Sciences Proceedings*, 25, 9, <https://doi.org/10.3390/ECWS-7-14200>, number: 1 Publisher: Multidisciplinary Digital Publishing Institute, 2023.

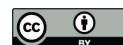

- Steduto, P., Hsiao, T. C., Raes, D., and Fereres, E.: AquaCrop—The FAO Crop Model to Simulate Yield Response to Water: I. Concepts and Underlying Principles, *Agronomy Journal*, 101, 426–437, <https://doi.org/10.2134/agronj2008.0139s>, [\\_eprint: https://onlinelibrary.wiley.com/doi/pdf/10.2134/agronj2008.0139s](https://onlinelibrary.wiley.com/doi/pdf/10.2134/agronj2008.0139s), 2009.
- 970 Swinnen, E., Van Hoolst, R., and Toté, C.: Copernicus Global Land Operations” Vegetation and Energy”, 12, 2021.
- Van Tricht, K., Degerickx, J., Gilliams, S., Zanaga, D., Battude, M., Grosu, A., Brombacher, J., Lesiv, M., Bayas, J. C. L., Karanam, S., Fritz, S., Becker-Reshef, I., Franch, B., Mollà-Bononad, B., Boogaard, H., Pratihast, A. K., Koetz, B., and Szantoi, Z.: WorldCereal: a dynamic open-source system for global-scale, seasonal, and reproducible crop and irrigation mapping, *Earth System Science Data*, 15, 5491–5515, <https://doi.org/10.5194/essd-15-5491-2023>, publisher: Copernicus GmbH, 2023.
- 975 Wada, Y., van Beek, L. P. H., and Bierkens, M. F. P.: Modelling global water stress of the recent past: on the relative importance of trends in water demand and climate variability, *Hydrology and Earth System Sciences*, 15, 3785–3808, <https://doi.org/10.5194/hess-15-3785-2011>, publisher: Copernicus GmbH, 2011.
- Wada, Y., Wissler, D., Eisner, S., Flörke, M., Gerten, D., Haddeland, I., Hanasaki, N., Masaki, Y., Portmann, F. T., Stacke, T., Tessler, Z., and Schewe, J.: Multimodel projections and uncertainties of irrigation water demand under climate change, *Geophysical Research Letters*, 40, 4626–4632, <https://doi.org/10.1002/grl.50686>, [\\_eprint: https://agupubs.onlinelibrary.wiley.com/doi/pdf/10.1002/grl.50686](https://agupubs.onlinelibrary.wiley.com/doi/pdf/10.1002/grl.50686), 2013.
- 980 Wriedt, G., Van der Velde, M., Aloe, A., and Bouraoui, F.: Estimating irrigation water requirements in Europe, *Journal of Hydrology*, 373, 527–544, <https://doi.org/10.1016/j.jhydrol.2009.05.018>, 2009.
- Yang, Z.-L. and Dickinson, R. E.: Description of the Biosphere-Atmosphere Transfer Scheme (BATS) for the Soil Moisture Workshop and evaluation of its performance, *Global and Planetary Change*, 13, 117–134, [https://doi.org/10.1016/0921-8181\(95\)00041-0](https://doi.org/10.1016/0921-8181(95)00041-0), 1996.
- 985 Yao, Y., Vanderkelen, I., Lombardozzi, D., Swenson, S., Lawrence, D., Jägermeyr, J., Grant, L., and Thiery, W.: Implementation and Evaluation of Irrigation Techniques in the Community Land Model, *Journal of Advances in Modeling Earth Systems*, 14, e2022MS003074, <https://doi.org/10.1029/2022MS003074>, [\\_eprint: https://onlinelibrary.wiley.com/doi/pdf/10.1029/2022MS003074](https://onlinelibrary.wiley.com/doi/pdf/10.1029/2022MS003074), 2022.
- Zhang, Z., Barlage, M., Chen, F., Li, Y., Helgason, W., Xu, X., Liu, X., and Li, Z.: Joint Modeling of Crop and Irrigation in the central United States Using the Noah-MP Land Surface Model, *Journal of Advances in Modeling Earth Systems*, 12, e2020MS002159, <https://doi.org/10.1029/2020MS002159>, [\\_eprint: https://onlinelibrary.wiley.com/doi/pdf/10.1029/2020MS002159](https://onlinelibrary.wiley.com/doi/pdf/10.1029/2020MS002159), 2020.
- 990 Zucaro, R.: Atlas of Italian Irrigation Systems 2014, Rome, Italy, [https://sigrian.crea.gov.it/wp-content/uploads/2019/11/Atlas\\_Italian\\_irrigation\\_2014\\_INEA.pdf](https://sigrian.crea.gov.it/wp-content/uploads/2019/11/Atlas_Italian_irrigation_2014_INEA.pdf), 2014.
